# Supplementary material for: Impacts on Atlantic Killifish from Neurotoxicants: Genes, Behavior, and Population-Relevant Outcomes
Source: PubMed Central journal article supplement (PMC11447911; doi:10.1021/acs.est.4c04207), 2024-09-17
Supplement: es4c04207_si_001.pdf [file es4c04207_si_001.pdf]

1 Article Title: Impacts on Atlantic killifish from neurotoxicants: genes, behavior, and population  
2 relevant outcomes

3

4 **Authors:** Janice L. Albers <sup>1</sup>, Lori N. Ivan <sup>1</sup>, Bryan W. Clark <sup>2</sup>, Diane E. Nacci <sup>2</sup>, Rebekah H.  
5 Klingler <sup>3</sup>, Adam Thrash <sup>4</sup>, Juan P. Steibel <sup>1</sup>, Natalia Garcia-Reyero Vinas <sup>5</sup>, Michael J. Carvan <sup>3</sup>  
6 and Cheryl A. Murphy <sup>1,\*</sup>

7 <sup>1</sup> Department of Fisheries and Wildlife, Michigan State University, East Lansing, MI, USA  
8 48824; albersja@msu.edu (J.A.); steibelj@msu.edu (J.S.); Inivan@msu.edu (L.I.);  
9 camurphy@msu.edu (C.M.)

10 <sup>2</sup> U.S. Environmental Protection Agency, Office of Research and Development, Center for  
11 Environmental Measurement and Modeling, Atlantic Coastal Environmental Sciences  
12 Division, Narragansett, RI, USA 02882; nacci.diane@epa.gov (D.N.); clark.bryan@epa.gov  
13 (B.C.)

14 <sup>3</sup> School of Freshwater Sciences, University of Wisconsin-Milwaukee, Milwaukee, WI, USA  
15 53204; klinglr@uwm.edu (R.K.); carvanmj@uwm.edu (M.C.)

16 <sup>4</sup> Mississippi State University, Institute for Genomics, Biocomputing and Biotechnology,  
17 Starkville, MS, USA 39759; thrash@igbb.msstate.edu (A.T.)

18 <sup>5</sup> Environmental Laboratory, US Army Engineer Research and Development Center, US Army  
19 Corps of Engineers, Vicksburg, MS, USA 39180; Natalia.G.Vinas@erdc.dren.mil (N.G.R.)

20 \* Correspondence: camurphy@msu.edu; Tel.: 517-432-7771 (C.M.)

21

22 63 pages

23 6 Figures

24 26 Tables

25

## 26 **Supplemental**

### 27 **Behavior Assay Methods**

28 After exposure, 7dpf embryos were rinsed in fresh seawater and transferred into 50-ml  
29 conical centrifuge tubes full of fresh seawater (< 50 embryos per tube) and shipped overnight to  
30 UWM, where they were placed in 12-well plates and maintained at 23° C (1-2 embryos per well  
31 with 1ml artificial seawater; Falcon® Corning, NY 12 well plate 85 x 128 mm, 22 mm diameter  
32 well). At 10 dpf, embryos were phenotyped microscopically when abnormalities in  
33 developmental stage and features were noted<sup>1,2</sup>. At 14 dpf, plates were rocked gently (~120rpm)  
34 and seawater added to each well to initiate hatching. Individual larvae were maintained in single  
35 wells for all assessments containing 3 mL seawater, incubated at 23° C, fed 24-h hatched *Artemia*  
36 ad lib daily, and renewed with seawater on alternate days. Individuals were assessed daily for  
37 survival until 23-24 dpf.

38 During larvae development, multiple behavior assays were conducted to determine if  
39 chemical exposure altered important behavioral milestones. Logistical constraints required two  
40 separate batches of fish to be produced (fertilized on August-8-2017 from parents on diets for  
41 103 days and August-21-2017 from parents on diets for 115 days) and for some fish to be  
42 included in multiple assays. KF were exposed to MeHg as embryos via parental transfer or were  
43 exposed through aqueous solution of PCB126 1-7 dpf. Embryos hatched at 14 dpf, assessed with  
44 the Visual Motor Response (VMR) assay at 16 dpf (n=144), a random subset contributed brain  
45 samples using lethal methods for gene expression at 17 dpf (n=69, 36 of whom had been through  
46 the VMR assay), assessed with Locomotion Behavior assay at 17 dpf (n=256, 108 of whom had  
47 been through the VMR assay), and feeding abilities were assessed at 23 or 24 dpf (n=192, 84 of

48 whom had been through the VMR and Locomotion assay and 192 had been through the  
49 Locomotion assay; see Table S1 for the total number of fish in each assay and treatment).

50

### 51 *VMR Assay*

52 Visual Motor Response (VMR) assays are a common test of fish neurological system  
53 function by startling the fish and evaluating their response<sup>3</sup>. VMRs were conducted using the  
54 same methodology as Mora-Zamorano et al. (2017), where 16 dpf larvae were tested in a special  
55 behavior chamber while in the transparent 12-well microliter plates. The testing chamber  
56 isolated the larvae from light and sound, as described in three previous studies<sup>4-6</sup> and provided  
57 adequate light and video surveillance to view all individual movement. VMR assays were  
58 conducted between the hours of 1200 and 1800 to minimize within day variability<sup>7</sup>. KF larvae  
59 were positioned in a dark behavior chamber and acclimated in the dark for 10 minutes (did not  
60 use data during this period), after which they underwent two cycles of alternating 10 min light  
61 and dark periods for a total of 50 min. This resulted in larvae used in the VMR analysis  
62 experiencing two startles each from dark to light and from light to dark and 4-10 minute periods  
63 differing light conditions: two dark and two light. Light levels during the light periods were set  
64 to 69 lx based on the work by MacPhail et al. (2009; Fisher Scientific Traceable Dual-Range  
65 Light Meter, Pittsburgh, PA).

66 Spontaneous movement of larvae was constantly recorded at a rate of 30 frames per sec and  
67 tracked using DanioVision© system version 8.0 (Noldus Information Technology, Leesburg,  
68 VA). Settings for tracking did not include smoothing of track. The minimal distance before  
69 movement was recorded was set to 0.2 mm, at which time the direct distance between the two  
70 points was calculated. Tracking errors were corrected by plotting all x, y coordinates and

71 locating and correcting occurrences where the track indicated movement but the fish did not  
72 move or track was outside the boundary of the dish. Occasionally when Ethovision lost a fish for  
73 1 to 3 frames (4-SCO-MeHg, 3-NBH-Ctrl, 3-NBH-PCB), the equidistant point/s between the  
74 previous and next location were calculated and used as locations.

75       Similar to Albers et al. (2022), this study used the censored fish locations to define  
76 individual larvae activity at each frame within each period. Speed at each frame was calculated  
77 as mm per sec and distance traveled in mm. Swimming was defined as larval movement that  
78 was at least 6 mm/sec or 0.2 mm per frame (i.e. magnitude of velocity at larvae center) and  
79 lasted longer than 5 frames (0.166 sec). Whereas the resting behavior occurred during frames  
80 where movement was less than 1 mm/sec or if greater than 1 mm/sec, lasted less than 5 frames.  
81 Where resting behavior was defined, speed and distance for those frames were changed to zero.  
82 In addition, the turning angle associated with each frame of swimming was calculated using the  
83 difference between the four-quadrant inverse tangent of the two trajectories. Where the first  
84 trajectory was constructed from the first two locations in the sequence, and the second trajectory  
85 from the second two locations in the sequence. This results in a turning angle that ranges from -  
86 3.14 to 3.14, where zero is straight ahead movement, negative values indicate right turns and  
87 positive values indicate left turns. Swimming bout characteristics (i.e. time between rest periods)  
88 were summarized using multiple metrics: number of bouts per second; the mean duration, speed,  
89 and turning angle (See Table S3 for definitions). The overall larval behavior during each period  
90 in the assay was also summarized using multiple overall summary metrics: total distance  
91 traveled, total time swimming, overall average step length and variation, overall turning angle  
92 and variation.

93 The fish larvae responded to the visual startle from the light change as is typical of previous  
94 startle responses<sup>3</sup>. Consequently, two behavior endpoints were calculated specifically to  
95 determine how larvae responding to the visual startle of the light turning off and on. To  
96 determine the magnitude of the response to the visual startle, we determined the frame where the  
97 maximum speed was traveled within 5 seconds after the startle. Then the difference between this  
98 maximum speed and the speed at the time of the startle was calculated to define the magnitude of  
99 the startle response. Startle response time was calculated as the difference in time between the  
100 startle and the frame where the maximum speed was traveled.

101

#### 102 *Locomotion Assay*

103 Typically, KF larvae initiate swimming soon after hatching<sup>9</sup>. The focus of this study was to  
104 assess larvae behavior at the point that larvae were independent and actively swimming.  
105 Consequently, the locomotion assay was conducted when KF larvae were 17 dpf (3 dph,  $6.8 \pm$   
106  $0.67$  mm in length,  $n=180$ ), where each 12-well plate was transferred to the behavior testing  
107 chamber. Since previous locomotion assays indicated some neurotoxicants impact larvae only  
108 during light periods<sup>4</sup>, light levels were constant during the entire assay and set to  $69 \text{ lx}$ <sup>7</sup>. Assays  
109 were conducted during the afternoon between 1200 and 1730 hrs. After an acclimation period of  
110 5 min, spontaneous movement of larvae were tracked every 30th of a second using  
111 DanioVision© software 8.0 with the same settings described for the VMR assay. Additionally,  
112 DanioVision© lost track of one fish for more than 300 frames, so this fish was not included in  
113 the analysis (treatment SCO-PCB).

114 Using the censored fish locations, the same activity endpoints used the VMR assay were  
115 calculated: average swimming bout speed, duration, frequency, turning angle (Table S3).

116 Additional behavior metrics that summarized other behaviors over the entire assay were also  
117 calculated: total distance traveled and swimming time, average step length and turning angle  
118 with their respective variations.

119 Using the same methods as Albers et al. (2022), a Hidden Markov Chain Model (HMM) was  
120 constructed for each fish in the locomotion assay (all fish swam at least once) to describe the  
121 different behavioral states and used them as additional behavior endpoints to determine effects  
122 from chemical exposure. A brief description of the method follows. For each larva and video  
123 frame, the step length and turning angle during the assay were used to construct multiple larval  
124 specific HMMs using the R package moveHMM<sup>10,11</sup>. Multiple behavior state models were  
125 examined that contained three possible swimming states: slow, medium, and fast swimming  
126 states where s1 HMMs contained only one behavior state, s2 HMMs contained any two behavior  
127 states, and s3 HMMs contained all three behavior states. The best fit HMM for each larvae was  
128 determined from a suite of ten potential HMM models, differing in the number of behavior states  
129 and initial starting values for each state (see Albers et al. 2022 Table S2 for model description  
130 and initial values).

131 Once all 10 of the possible HMMs were completed, a hierarchical selection for the best  
132 fitting model was conducted, essentially using successfully converged models with the lowest  
133 AIC. Even though the initial state values were set up in increasing step length means, the  
134 resulting best fit HMM state parameter estimates did not always have increasing step length for  
135 each additional behavior. This is probably due to the final HMM behavior state being defined by  
136 not only the step length but also turning angle characteristics. To make sure the behavior state  
137 comparisons were comparing similar states with the same name, the states were reordered and  
138 renamed in order to compare between larvae. First, states were reordered using the mean step

139 length to describe them as slow, medium and faster swimming behavior states (i.e. changed the  
140 state name). Next a Linear Discriminant Model was constructed using the `lda` function in the  
141 MASS package<sup>12</sup> and cross validation to compare between models using the s3 models as a  
142 reference. LDA prediction accuracy for all models (s1, s2, and s3) was measured using cross  
143 validation where a random draw of 80% of the data was used to construct a model and then  
144 calculated prediction accuracy of the remaining 20% of the data. This was done 50 times for  
145 each treatment group of data to determine overall accuracy ( $98 \pm 0.02$  %) and within state  
146 accuracy (slow state =  $99 \pm 0.01$  %, medium state =  $99 \pm 0.01$  %, and fast state =  $95 \pm 0.05$  %;  
147 Table S4).

148 When treatment level tests were conducted on slow, medium and fast states, this comparison  
149 was only conducted with fish that performed those states making the number of larvae used for  
150 the model (see Treatment Testing section below) different for each comparison (Table S1).

151

## 152 *Feeding Assay*

153 Typically, KF larvae initiate feeding at 17 dpf<sup>13</sup>. This study focused on assessing larvae  
154 behavior at the point that larvae were independent and feeding. Consequently, feeding ability in  
155 KF was assessed when they were 23 or 24 dpf (9 or 10 dph;  $10.6 \pm 0.82$  mm). Larva were  
156 transferred from the 22 mm diameter wells to 54 mm diameter petri dishes at 22 dpf (60 mm  
157 petri dish). Feeding of *Artemia* continued morning and evening until ~24hr prior to the assay, so  
158 fish would be in a hungry state for the test. Similar to locomotion assays, feeding assays were  
159 conducted over a two-day period between 1300 and 1920 hrs at a light level of 69 lx. Feeding  
160 assays were conducted in the same behavior chamber as the locomotion assay, when after 5

161 minutes of acclimation, recording started and ~15 (range 13-19) live *Artemia* were added to the  
162 dish. The test ended when 5 minutes had elapsed from when the *Artemia* were added to the dish.

163 Feeding bouts consisted of multiple presentations; the characteristic curved body posture,  
164 continuously swimming straight or at rest by just opening their mouths. For each of these  
165 presentations, the distance between the middle of the larva's mouth and *Artemia* was measured at  
166 the time the larva orientated toward the *Artemia*, with their either eyes or body. This distance  
167 was termed predator reactive distance and was measured using ImageJ (version 1.51j8). For  
168 each capture attempt toward an *Artemia*, we recorded whether the larva successfully captured the  
169 *Artemia* and the time it took the larva to handle and consume the *Artemia*. Typically after a  
170 catching an *Artemia*, the larva sat or drifted momentarily and did not swim while it was  
171 consuming the prey. Handling time was defined as the time between prey capture and when the  
172 larva resumed normal swimming activity. Additionally, three consumption metrics were  
173 calculated: capture proportion defined as the number of captures divided by the total number of  
174 *Artemia* added to the dish, miss proportion defined as the number of feeding capture attempts  
175 that missed the *Artemia* divided by the total number of successful and unsuccessful capture  
176 attempts, and capture attempt ratio defined as the total number of feeding capture attempts  
177 (successful and unsuccessful) divided by the total number of *Artemia* added to the dish. When  
178 two *Artemia* were consumed during one feeding capture attempt, the consumption of both  
179 *Artemia* were assigned the same measurements.

180

## 181 **Bayesian Model Analysis**

182



183 For each behavioral endpoint (Table S3), we conducted a series of preliminary and final  
184 tests to determine whether there were differences between chemical dose treatments. The three  
185 different behavior assays and the number of behavior responses we measured were Feeding-5,  
186 Visual Motor Response (VMR) - 58, Locomotion - 30. Behavior responses that were not already  
187 normally distributed, we attempted to normalize using the boxcox function in the R MASS  
188 package<sup>12</sup> (Table S5). Using a basic model containing only the treatment factor, behavior  
189 endpoints were transformed using the maximum lambda parameter for the exponential  
190 transformation suggested by the boxcox function in the R MASS package. Below we describe  
191 the five different models that were used on the 93 behavior responses to determine differences  
192 between treatments, (see Table S5 for final transformation and model used for each behavior  
193 endpoint). Fitting multiple model types was necessary due to the various behavior endpoints  
194 having distinctively different distributions such as a proportional, normal, or a skewed response  
195 that even Box Cox transformations were not successful in normalizing.

196

### 197 *Model Description*

198 The Bayesian models used in locomotion and VMR behavior response models consisted  
199 of one main effect (treatment with 5 levels), covariate variable time of assay and a random batch  
200 effect because assays were ran in batches of 24-well dishes. The Bayesian model used for a  
201 locomotion and VMR behavior responses was

202

203 *Locomotion or VMR Behavior Endpoint*<sub>ijkl</sub>

$$= \alpha + \beta_j * treatment_j + \delta_k * assay\ time_{k(i)} + \omega_l * batch_{l(i)} + \varepsilon_{ijkl}$$

204 where *Locomotion or VMR Behavior Endpoint*<sub>ijkl</sub> is the behavioral response metric  
 205 on the *i*<sup>th</sup> individual, *j*<sup>th</sup> treatment, *k*<sup>th</sup> assay time and *l*<sup>th</sup> batch;  $\alpha$  is the intercept,  $\beta_j$  is the  
 206 treatment coefficient with a  $Normal(0, \sigma_\beta^2)$  distribution,  $\delta$  is the assay time coefficient with a  
 207  $Normal(0, \sigma_\delta^2)$  distribution,  $\omega_l$  is the batch coefficient, and  $\varepsilon_{ijkl}$  is the residual error. Treatment  
 208 and batch are indicator variables containing 1 if the observation belongs to the corresponding  
 209 factor category and 0 otherwise. Prior distributions for these two components are described in  
 210 Table S6. Additionally, priors were needed for the  $\alpha$ , treatment and assay time effects. In all  
 211 models, we used non-informative, flat priors. For  $\alpha$ , treatment, and assay time we assumed a  
 212 normal distribution with a mean of 0 and standard deviation of at least  $1.0 \times 10^4$  (i.e. precision of  
 213  $1.0 \times 10^{-4}$ ). OpenBUGS model code for these models is shown in Tables S7, S8 and S9.

214 Two other Bayesian models were used to model the five feeding behavior responses that  
 215 did not contain a batch effect since feeding assays were conducted one fish at a time.  
 216 Additionally, days post fertilization (dpf) was included as a covariate since larvae were either 23  
 217 or 24 dpf. Lastly, these models did include intercept, treatment and assay time as described for  
 218 the locomotion and VMR behavior models.

219

220 1) Normal response model

$$221 \quad \begin{aligned} & \textit{Feeding Behavior Endpoint}_{ijkl} \\ & = \alpha + \beta_j * \textit{treatment}_j + \delta * \textit{assay time}_{k(l)} + \omega * \textit{dpf}_{l(l)} + \varepsilon_{ijkl} \end{aligned}$$

222 where *Feeding Behavior Endpoint*<sub>ijkl</sub> is the prey handling time, lunge ratio or reaction  
 223 distance (Table S5) on the *i*<sup>th</sup> individual, *j*<sup>th</sup> treatment, *k*<sup>th</sup> assay time and *l*<sup>th</sup> dpf;  $\alpha$ ,  $\beta_j$  and,  $\delta$  and  
 224 their priors were described before, and  $\omega$  is the dpf coefficient also with a non-informative

225 normal prior assuming a normal distribution with a mean of 0 and standard deviation of at least  
 226  $1.0 \times 10^4$  (i.e. precision of  $1.0 \times 10^{-4}$ ). Lastly, the residual error followed a normal distribution  
 227  $\varepsilon \sim \text{Normal}(0, \sigma_\varepsilon^2)$  with variance  $\frac{1}{\sigma_\varepsilon^2} = \tau_j \sim I - \text{Gamma}(0.0001, 0.0001)$ . OpenBUGS code is  
 228 presented in Table S10.

229 2) Binomial response model

230  $\text{Feeding Behavior Endpoint}_{ijkl} \sim \text{Binomial}(p_{ijkl}, N_{ijkl})$

231  $\text{logit}(p_{ijkl}) = \beta_j * \text{treatment}_{j(i)} + \delta * \text{assay time}_{k(i)} + \omega * \text{dpf}_{l(i)} + \varepsilon_{ijkl}$

232

233 where  $\text{Feeding Behavior Endpoint}_{ijkl}$  is the prey capture probability or prey miss  
 234 proportion (Table S8) on the  $i^{\text{th}}$  individual,  $j^{\text{th}}$  treatment,  $k^{\text{th}}$  assay time and  $l^{\text{th}}$  dpf and  $N_{ijkl}$  is the  
 235 number of trials and  $p_{ijkl}$  is the probability of success distributed on a logit scale. The priors for  
 236  $\beta_j$ ,  $\delta$  and  $\omega$  where described before. Lastly, the residual error followed a normal distribution

237  $\varepsilon \sim \text{Normal}(0, \sigma_\varepsilon^2)$  with variance  $\frac{1}{\sigma_\varepsilon^2} = \tau_j \sim I - \text{Gamma}(0.01, 0.01)$ . OpenBUGS code is

238 presented in Table S11.

239

240 *Model Fitting and Convergence Diagnostics*

241 Bayesian models were constructed using OpenBUGS version 3.2.3 rev 1012 <sup>14</sup>, R  
 242 version 3.6.0 <sup>11</sup> and packages R2OpenBUGS version 3.2 <sup>15</sup> and coda version 0.19-2 <sup>16</sup>. We fit  
 243 the basic model using three chains, each with a minimum of 10000 iterations, 1000 burn in, and  
 244 1 thin, and monitored a subsample of parameters for convergence: treatment effects, overall  
 245 mean, residuals, variance(s), precision parameter(s), and degree of freedom parameter(s). Then  
 246 we performed preliminary multiple MCMC chain convergence diagnostics using Trace plots. If

247 model did not converge, we increased either the number of iterations, burn in, or thin. Once the  
248 preliminary model trace plots were not showing any obvious convergence problems, further  
249 MCMC diagnostics were applied using a suite of tools to determine adequate MCMC chain  
250 length, model convergence and fit. 1) Autocorrelation plots indicated the level of thinning  
251 required to remove any autocorrelation. 2) Gelman-Rubin-Brooks shrink factor plots indicated  
252 the adequate number of iterations needed for burn in. 3) Raftery and Lewis's diagnostic tables  
253 were used to determine the number of additional iterations needed for accurate parameter  
254 estimation (default values of  $q = 0.025$ ,  $r = \pm 0.005$  and  $s = 0.95$ ). 4) Finally, model goodness-  
255 of-fit was evaluated using residual diagnostics. When alternative models were to be compared,  
256 the model with the best posterior predictive distributions of residuals and replicated observations  
257 was retained.

258         Once a best-fitted model had been determined, we re-fit the model with the appropriate  
259 settings and monitored a slightly different suite of parameters: overall mean; population level  
260 treatment effects; variance and precision parameters; tail area probabilities of observing a  
261 difference; degrees of freedom; individual level predicted means, etc. With the model output and  
262 iteration levels we also determined effective sample size (effectiveSize function in coda R  
263 package), posterior distributions of parameters, and calculated a one-sided tail area probabilities  
264 (Bayesian P-values) from the two sided difference of parameter distributions. The summary  
265 output of this last model fit is presented in the results section of the paper and all relevant  
266 parameter posterior distributions can be found in Table S13.

267

## 268 **Behavior Treatment Testing**

269 All behavioral endpoints were examined for treatment differences using Bayesian statistical  
270 methods (see Supplemental section for additional details). Bayesian models for locomotion  
271 behavior responses consisted of one main effect (treatment with 5 levels), covariate variable  
272 (time of test and/or dpf) and a random batch effect since assays were ran in batches of 12-well  
273 dishes. Bayesian models for feeding behavior were the same except no random batch was  
274 included since each assay was conducted with one larva. Response variables and residuals were  
275 examined for normality using density distributions and Box Cox transformation were applied  
276 where needed in all non-negative response variables using the boxcox function in the MASS  
277 package (Table S5<sup>212</sup>). All responses that were normally distributed either with or without a  
278 transformation were predicted using a normal distribution model, responses that were severely  
279 right skewed were predicted using a t distribution model where degrees of freedom (df) was  
280 estimated with dunif (3, 30), and responses that were proportional were fit with a logistic  
281 distribution model (Tables S6, S7, S8 and S9, S10, respectively). Priors were set to be non-  
282 informative and all models were ran with three chains (see supplemental material for detailed  
283 methods; Table S6). To facilitate future use of parameter estimates, this study generated both  
284 overall population and individual level parameter estimates (Table S12). Lastly, a Chi-Square  
285 test from the R stats package<sup>11</sup> was used to determine whether the proportion of s1, s2 and s3  
286 HMMs selected were different between treatments.

287

## 288 **Brain Gene Expression**

### 289 *Brain collection*

290 Brain collection was performed essentially as described by Vargas et al. (2011) on 17 dpf  
291 MeHg and PCB126 exposed larvae. A random subset of larvae were removed after the VMR

292 assay to contribute brain samples for gene expression at 17 dpf (n=69, 36 of whom had been  
293 through the VMR assay and 33 had not). Larvae were gently transferred to a 60 mm petri dish  
294 and 4°C embryo medium was quickly added to provide anesthesia. Five larvae were transferred  
295 to a new petri dish, water was removed, and individuals were immobilized in a drop of 2% low  
296 melting point agarose made with artificial cerebral spinal fluid (aCSF; 131 mM NaCl, 2 mM  
297 KCl, 1.25 mM KH<sub>2</sub>PO<sub>4</sub>, 2 mM MgSO<sub>4</sub>, 10 mM glucose, 2.5 mM CaCl<sub>2</sub>, 20 mM NaHCO<sub>3</sub>). A  
298 dissection pin was used to mount the larvae in dorsal/ventral recumbency, just under the surface  
299 of the agarose. Artificial cerebral spinal fluid was added and dishes were placed on ice. Intact  
300 brains were removed using dissection pins, transferred individually in 5µl aCSF to 1.5 ml  
301 microcentrifuge tubes, then frozen in liquid nitrogen prior to storage at -80°C.

302

### 303 *Brain Gene Analysis*

304 Genomic analysis was conducted at Mississippi State University, Institute for Genomics,  
305 Biocomputing and Biotechnology. Total RNA was isolated from 6 embryos' brains per  
306 treatment from individual 17 dpf embryos using the Qiagen RNeasy® Micro Kit (Germantown,  
307 MD, USA) following the Purification of Total RNA from Animal and Human Tissues protocol  
308 in the RNeasy® Micro Handbook with slight modifications. The modification included  
309 homogenization of brain tissue in 350 µL of RLT buffer using a pellet pestle and elution of Total  
310 RNA using 15 µL of RNase-free water. RNA quality was assayed using the Agilent High  
311 Sensitivity RNA ScreenTape System (Waldbronn, Germany) for the Agilent 2200 TapeStation  
312 (Palo Alto, CA, USA), and RNA was quantified using the NanoDrop 2000 (ThermoFisher  
313 Scientific, Waltham, MA).

314 The raw reads from 36 KF samples (6 groups with 6 reps) were mapped and quantified using  
315 salmon<sup>18</sup> (v1.3.0) against the reference transcriptome (NCBI *Fundulus heteroclitus* annotation  
316 release 102; assembly MU-UCD\_Fhet\_4.1). Tximport<sup>19</sup> (v1.16.1) was used to import transcript-  
317 level estimates from salmon summarize this data to the gene level. These genes were filtered  
318 such that only genes with an average log Counts per Million > 1 across all samples were retained  
319 for differential expression analysis. EdgeR (v3.30.3) was used to determine differentially  
320 expressed genes (DEGs). OrthoFinder (v2.5.4) was used to find orthologous genes in *D. rerio*.  
321 The GO.db R package <sup>20</sup> (v3.12.1) was used to look up GO terms from GO IDs, and the  
322 KEGGREST R package <sup>21</sup> (v1.30.1) was used to look up KEGG pathway names. The GAGE R  
323 package<sup>22</sup> (v2.40.0) was used to perform gene-set enrichment analysis using *D. rerio* GO gene-  
324 sets, KEGG gene-sets and the *D. rerio* orthologs of genes that passed the filter. Significant  
325 trends were determined using an alpha of 0.05 [false discovery rate (FDR) and q-value]. Brain  
326 gene expression data for each embryo in each treatment can be found at  
327 [www.ncbi.nlm.nih.gov/geo](http://www.ncbi.nlm.nih.gov/geo).

328

### 329 **Individual Based Model**

330 The model used in this study is described in Ivan et al. (In Review) with a few changes.  
331 First, the calibration in this study was unique to KF and did not include any other species.  
332 Second, the model in this study did not contain uncertainty as described in Ivan et al. (In  
333 Review). Lastly, this study added an additional time period of summer since KF have an  
334 extended spawning season and we wanted to investigate the possibility that seasonal changes in  
335 predation may occur.

336 The IBM tracked 2500 individual larvae (based on wild densities) from hatch to juvenile  
 337 transition, defined at 24 mm<sup>23</sup> or until 100 days, whichever occurred first (Figure S2). Daily,  
 338 individuals forage, grow and experience mortality. Killifish forage on two types of prey.  
 339 Foraging consists of prey encounters, handling time, capture success and consumption of nauplii  
 340 and/or copepods. Swimming speed, handling time, larvae reactive distance and capture success  
 341 all determine how many prey an individual KF larval consumes. KF then grow ( $G_{j,d}$  in g/d) as  
 342

$$G_{j,d} = C_{j,d} - R_{j,d} - F_{j,d} - U_{j,d} - SDA_{j,d}$$

343 where  $C_{j,d}$  (g/d) is the consumption of prey by larval fish j,  $R_{j,d}$  is respiration (g/d),  $F_{j,d}$  is egestion  
 344 (g/d),  $U_{j,d}$  is the excretion (g/d) and  $SDA_{j,d}$  (g/d) is the specific dynamic action. Consumption is  
 345 determined via the foraging but capped at  $C_{max,j,d}$  (g/d) as determined from the Wisconsin  
 346 Bioenergetic equations<sup>24</sup>. Finally, KF are monitored for starvation and predation mortality.  
 347 Predators of KF are adult KF and their predation rates are temperature dependent<sup>24</sup>. Fish that die  
 348 are removed from the daily loop, as are fish that reach 24mm. Output variables of interest are 1)  
 349 the number of survivors (fry that reach the exit length within the 100 days) and 2) the mean  
 350 growth rate (mm/d) of survivors.

351 Sublethal effects of MeHg and PCB126 were incorporated into the model via multipliers  
 352 derived from the Bayesian individual level predicted treatment posterior distributions (Table  
 353 S13). The individual level posterior distributions were used to create 10,000 random values from  
 354 a truncated normal distribution. If the posterior distribution was from a transformed behavior  
 355 endpoint, then these random values were back transformed. From these random values, the  
 356 multiplier distributions were generated (S12). Multipliers were placed on larval swimming  
 357 speed from the locomotion assay; larval capture success of zooplankton, larval handling time of  
 358 zooplankton, and larval reactive distance to zooplankton from the feeding assay. At the start of



359 each simulation (replication), each model individual  $j$  was assigned a multiplier for each of the  
360 above four variables. For each simulated KF ( $j$ ), a swimming speed multiplier ( $SM_j$ ) was  
361 generated as

$$362 \quad SM_j = TD_j / MD$$

363 where  $TD_j$  is the average speed (mm/s) by fish  $j$  and  $MD$  is the treatment mean average speed  
364 (mm/s). Multipliers for handling time ( $HM_j = TH_j / MH$ ), capture success ( $CM_j = TC_j / MC$ )  
365 and reactive distance ( $RM_j = TR_j / MR$ ) were calculated for each experimental fish  $j$  as using the  
366 same procedure. Finally, the amount of time a fish was active was determined by the proportion  
367 of time fish were active in the locomotion assay. Proportions were derived from the posterior  
368 distributions for each scenario. If necessary, back-transformations were performed prior to the  
369 multiplier calculation. Lastly, the proportion of time a KF was actively searching for food or  
370 encountering a predator was scaled to the percent of time active larvae were in the locomotion  
371 assay by randomly assigning a time scaler to each fish at the beginning of the simulation (i.e.  
372 multiply 12 hours by percent of time active in assay).

373 The model was calibrated using SCO KF such that growth rates were set to be  
374 approximately 0.3mm/d (unpublished). To determine if differences occurred between which  
375 season the adult fish spawn, we ran simulations for spring and summer runs. For spring runs  
376 beginning on Julian day 110, the first fish reached 24mm around day 53 with several individuals  
377 still growing but under the size of 24mm at the end of the model run (Figure S4). For the  
378 summer runs (Julian day 230), the first fish to reach 24mm at the end of the model run was on  
379 day 48 with few fish remaining in the simulation at the end of the model run (Figure S4).

380

## 381 **Results**

382 All larvae within each chemical/year/treatment group were successfully fitted with a  
383 HMM (Table S1). The number of larvae that consisted of one, two, or three behavior states  
384 exhibited a consistent pattern within each treatment, where a one state behavior model was never  
385 the best, three fish exhibited a two state model, and the rest of the fish were best fit using a three  
386 state behavior model (253 fish; Figure S3).

387

#### 388 Behavior/Gene Expression

389 This study focused on finding behaviors that reacted in a similar pattern to either MeHg  
390 or PCB126 treatments. In addition, we also tested individual genes and whether they responded  
391 in a similar pattern as any of the behavior endpoints. These results are reported in Tables 2 and  
392 S18 to S24.

393

#### 394 References

395

- 396 (1) Clark, B. W.; Matson, C. W.; Jung, D.; Di Giulio, R. T. AHR2 Mediates Cardiac  
397 Teratogenesis of Polycyclic Aromatic Hydrocarbons and PCB-126 in Atlantic Killifish  
398 (*Fundulus heteroclitus*). *Aquat. Toxicol.* **2010**, *99* (2), 232–240.  
399 <https://doi.org/10.1016/j.aquatox.2010.05.004>.
- 400 (2) Whitehead, A.; Triant, D. A.; Champlin, D.; Nacci, D. Comparative Transcriptomics  
401 Implicates Mechanisms of Evolved Pollution Tolerance in a Killifish Population. *Mol.*  
402 *Ecol.* **2010**, *19* (23), 5186–5203. <https://doi.org/10.1111/j.1365-294X.2010.04829.x>.
- 403 (3) Emran, F.; Rihel, J.; Dowling, J. E. A Behavioral Assay to Measure Responsiveness of  
404 Zebrafish to Changes in Light Intensities. *J. Vis. Exp.* **2008**, No. 20, 6.  
405 <https://doi.org/10.3791/923>.
- 406 (4) Mora-Zamorano, F. X.; Klingler, R.; Basu, N.; Head, J.; Murphy, C. A.; Binkowski, F. P.;  
407 Larson, J. K.; Carvan, M. J. Developmental Methylmercury Exposure Affects Swimming  
408 Behavior and Foraging Efficiency of Yellow Perch (*Perca flavescens*) Larvae. *ACS*  
409 *Omega* **2017**, *2* (8), 4870–4877. <https://doi.org/10.1021/acsomega.7b00227>.
- 410 (5) Mora-Zamorano, F. X.; Klingler, R. H.; Murphy, C. A.; Basu, N.; Head, J.; Carvan, M. J.  
411 Parental Whole Life Cycle Exposure to Dietary Methylmercury in Zebrafish (*Danio rerio*)  
412 Affects the Behavior of Offspring. *Environ. Sci. Technol.* **2016**, *50* (9), 4808–4816.  
413 <https://doi.org/10.1021/acs.est.6b00223>.
- 414 (6) Mora-Zamorano, F. X.; Svoboda, K. R.; Carvan, M. J. The Nicotine-Evoked Locomotor  
415 Response: A Behavioral Paradigm for Toxicity Screening in Zebrafish (*Danio rerio*)

- Embryos and Eleutheroembryos Exposed to Methylmercury. *PLoS One* **2016**, *11* (4), e0154570. <https://doi.org/10.1371/journal.pone.0154570>.
- (7) MacPhail, R. C.; Brooks, J.; Hunter, D. L.; Padnos, B.; Irons, T. D.; Padilla, S. Locomotion in Larval Zebrafish: Influence of Time of Day, Lighting and Ethanol. *Neurotoxicology* **2009**, *30* (1), 52–58. <https://doi.org/10.1016/J.NEURO.2008.09.011>.
- (8) Albers, J. L.; Steibel, J. P.; Klingler, R. H.; Ivan, L. N.; Garcia-Reyero, N.; Carvan, M. J.; Murphy, C. A. Altered Larval Yellow Perch Swimming Behavior Due to Methylmercury and PCB126 Detected Using Hidden Markov Chain Models. *Environ. Sci. Technol.* **2022**, *56* (6), 3514–3523. <https://doi.org/10.1021/acs.est.1c07505>.
- (9) Weis, J. S.; Weis, P. Swimming Performance and Predator Avoidance by Mummichog (*Fundulus Heteroclitus*) Larvae after Embryonic or Larval Exposure to Methylmercury. *Can. J. Fish. Aquat. Sci.* **1995**, *52* (10), 2168–2173. <https://doi.org/10.1139/f95-809>.
- (10) Michelot, T.; Langrock, R.; Patterson, T. A. MoveHMM: An R Package for the Statistical Modelling of Animal Movement Data Using Hidden Markov Models. *Methods Ecol. Evol.* **2016**, *7* (11), 1308–1315. <https://doi.org/10.1111/2041-210X.12578>.
- (11) R Core Team. *R: A Language and Environment for Statistical Computing*; R version 4.0.4, x86\_64-w64-mingw32/x64 (64-bit): Vienna, Austria, 2019.
- (12) Venables, W. N.; Ripley, B. D. *Modern Applied Statistics with S*, Fourth.; Springer New York, 2002.
- (13) Weis, J. S.; Weis, P. Effects of Embryonic Exposure to Methylmercury on Larval Prey-Capture Ability in the Mummichog, *Fundulus Heteroclitus*. *Environ. Toxicol. Chem.* **1995**, *14* (1), 153–156. <https://doi.org/10.1002/etc.5620140117>.
- (14) Lunn, D.; Spiegelhalter, D.; Thomas, A.; Best, N. The BUGS Project: Evolution, Critique and Future Directions. *Stat. Med.* **2009**, *28* (25), 3049–3067. <https://doi.org/10.1002/sim.3680>.
- (15) Sturtz, S.; Ligges, U.; Gelman, A. R2WinBUGS : A Package for Running WinBUGS from R. *J. Stat. Softw.* **2005**, *12* (3). <https://doi.org/10.18637/jss.v012.i03>.
- (16) Plummer, M.; Best, N.; Cowles, K.; Vines, K. CODA: Convergence Diagnosis and Output Analysis for MCMC. *R News* **2005**, *6*, 7–11.
- (17) Vargas, R.; Jóhannesdóttir, I. Þ.; Sigurgeirsson, B.; Þorsteinsson, H.; Karlsson, K. Æ. The Zebrafish Brain in Research and Teaching: A Simple in Vivo and in Vitro Model for the Study of Spontaneous Neural Activity. *Adv. Physiol. Educ.* **2011**, *35* (2), 188–196. <https://doi.org/10.1152/advan.00099.2010>.
- (18) Patro, R.; Duggal, G.; Love, M. I.; Irizarry, R. A.; Kingsford, C. Salmon Provides Fast and Bias-Aware Quantification of Transcript Expression. *Nat. Methods* **2017**, *14* (4), 417–419. <https://doi.org/10.1038/nmeth.4197>.
- (19) Soneson, C.; Love, M. I.; Robinson, M. D. Differential Analyses for RNA-Seq: Transcript-Level Estimates Improve Gene-Level Inferences. *F1000Research* **2015**, *4*, 1521. <https://doi.org/10.12688/f1000research.7563.1>.
- (20) Carlson, M. GO.db: A Set of Annotation Maps Describing the Entire Gene Ontology R Package Version 3.12.1. 2019.
- (21) Tenenbaum, D. KEGGREST: Client-Side REST Access to KEGG R Package Version 1.30.1. 2015.
- (22) Luo, W.; Friedman, M. S.; Shedden, K.; Hankenson, K. D.; Woolf, P. J. GAGE: Generally Applicable Gene Set Enrichment for Pathway Analysis. *BMC Bioinformatics* **2009**, *10* (1), 161. <https://doi.org/10.1186/1471-2105-10-161>.

- 462 (23) Abraham, B. J. *Species Profiles Life Histories and Environmental Requirements of*  
463 *Coastal Fishes and Invertebrates Mid-Atlantic USA Mummichog and Striped Killifish*; U  
464 S Fish and Wildlife Service Biological Report 8211, 223 p., 1985.
- 465 (24) Deslauriers, D.; Chipps, S. R. S. R.; Breck, J. E. J. E.; Rice, J. A. J. A.; Madenjian, C. P.  
466 C. P. Fish Bioenergetics 4.0: An R-Based Modeling Application. *Fisheries* **2017**, *42* (11),  
467 586–596. <https://doi.org/10.1080/03632415.2017.1377558>.
- 468 (25) Smith, K. J.; Taghon, G. L.; Able, K. W. Trophic Linkages in Marshes: Ontogenetic  
469 Changes in Diet for Young-of-the-Year Mummichog, *Fundulus Heteroclitus*. In *Concepts*  
470 *and Controversies in Tidal Marsh Ecology*; Weinstein, M. P., Kreeger, D. A., Eds.;  
471 Kluwer Academic Publishers: Dordrecht, 2002; pp 121–237. [https://doi.org/10.1007/0-](https://doi.org/10.1007/0-306-47534-0_11)  
472 [306-47534-0\\_11](https://doi.org/10.1007/0-306-47534-0_11).
- 473 (26) Marteinsdottir, G.; Able, K. W. Influence of Egg Size on Embryos and Larvae of  
474 *Fundulus Heteroclitus* (L.). *J. Fish Biol.* **1992**, *41*, 883–896.
- 475 (27) Kneib, R. T.; Parker, J. H. Notes: Gross Conversion Efficiencies of Mummichog and  
476 Spotfin Killifish Larvae from a Georgia Salt Marsh. *Trans. Am. Fish. Soc.* **1991**, *120* (6),  
477 803–809. [https://doi.org/10.1577/1548-8659\(1991\)120<0803:NGCEOM>2.3.CO;2](https://doi.org/10.1577/1548-8659(1991)120<0803:NGCEOM>2.3.CO;2).
- 478 (28) Letcher, B. H.; Rice, J. A.; Crowder, L. B.; Rose, K. A. Variability in Survival of Larval  
479 Fish: Disentangling Components with a Generalized Individual-Based Model. *Can. J.*  
480 *Fish. Aquat. Sci.* **1996**, *53* (4), 787–801. <https://doi.org/10.1139/f95-241>.
- 481 (29) Fleeger, J. W.; Johnson, D. S.; Galván, K. A.; Deegan, L. A. Top-down and Bottom-up  
482 Control of Infauna Varies across the Saltmarsh Landscape. *J. Exp. Mar. Bio. Ecol.* **2008**,  
483 *357* (1), 20–34. <https://doi.org/10.1016/j.jembe.2007.12.003>.
- 484 (30) Fulford, R. S.; Rice, J. A.; Miller, T. J.; Binkowski, F. P.; Dettmers, J. M.; Belonger, B.  
485 Foraging Selectivity by Larval Yellow Perch ( *Perca Flavescens* ): Implications for  
486 Understanding Recruitment in Small and Large Lakes. *Can. J. Fish. Aquat. Sci.* **2006**, *63*  
487 (1), 28–42. <https://doi.org/10.1139/f05-196>.
- 488 (31) Hartman, K. J.; Brandt, S. B. Predatory Demand and Impact of Striped Bass, Bluefish, and  
489 Weakfish in the Chesapeake Bay: Applications of Bioenergetics Models. *Can. J. Fish.*  
490 *Aquat. Sci.* **1995**, *52* (8), 1667–1687. <https://doi.org/10.1139/f95-760>.
- 491 (32) Walton, W. E.; Hairston, N. G.; Wetterer, J. K. Growth-Related Constraints on Diet  
492 Selection by Sunfish. *Ecology* **1992**, *73* (2), 429–437. <https://doi.org/10.2307/1940750>.
- 493 (33) Valiela, I.; Wright, J. E.; Teal, J. M.; Volkmann, S. B. Growth, Production and Energy  
494 Transformations in the Salt-Marsh Killifish *Fundulus Heteroclitus*. *Mar. Biol.* **1977**, *40*  
495 (2), 135–144. <https://doi.org/10.1007/BF00396259>.
- 496 (34) Madon, S. P.; Williams, G. D.; West, J. M.; Zedler, J. B. The Importance of Marsh Access  
497 to Growth of the California Killifish, *Fundulus Parvipinnis*, Evaluated through  
498 Bioenergetics Modeling. *Ecol. Modell.* **2001**, *136* (2–3), 149–165.  
499 [https://doi.org/10.1016/S0304-3800\(00\)00416-6](https://doi.org/10.1016/S0304-3800(00)00416-6).
- 500 (35) Cowan, J. H. J.; Houde, E. D.; Rose, K. A. Size-Dependent Vulnerability of Marine Fish  
501 Larvae to Predation: An Individual-Based Numerical Experiment. *ICES J. Mar. Sci.* **1996**,  
502 *53*, 23–37.

**Figure S1.** Behavior assays used in this study to collect data on Atlantic killifish larvae for assessment of chemical responses and for inputs into the Individual Based Model.

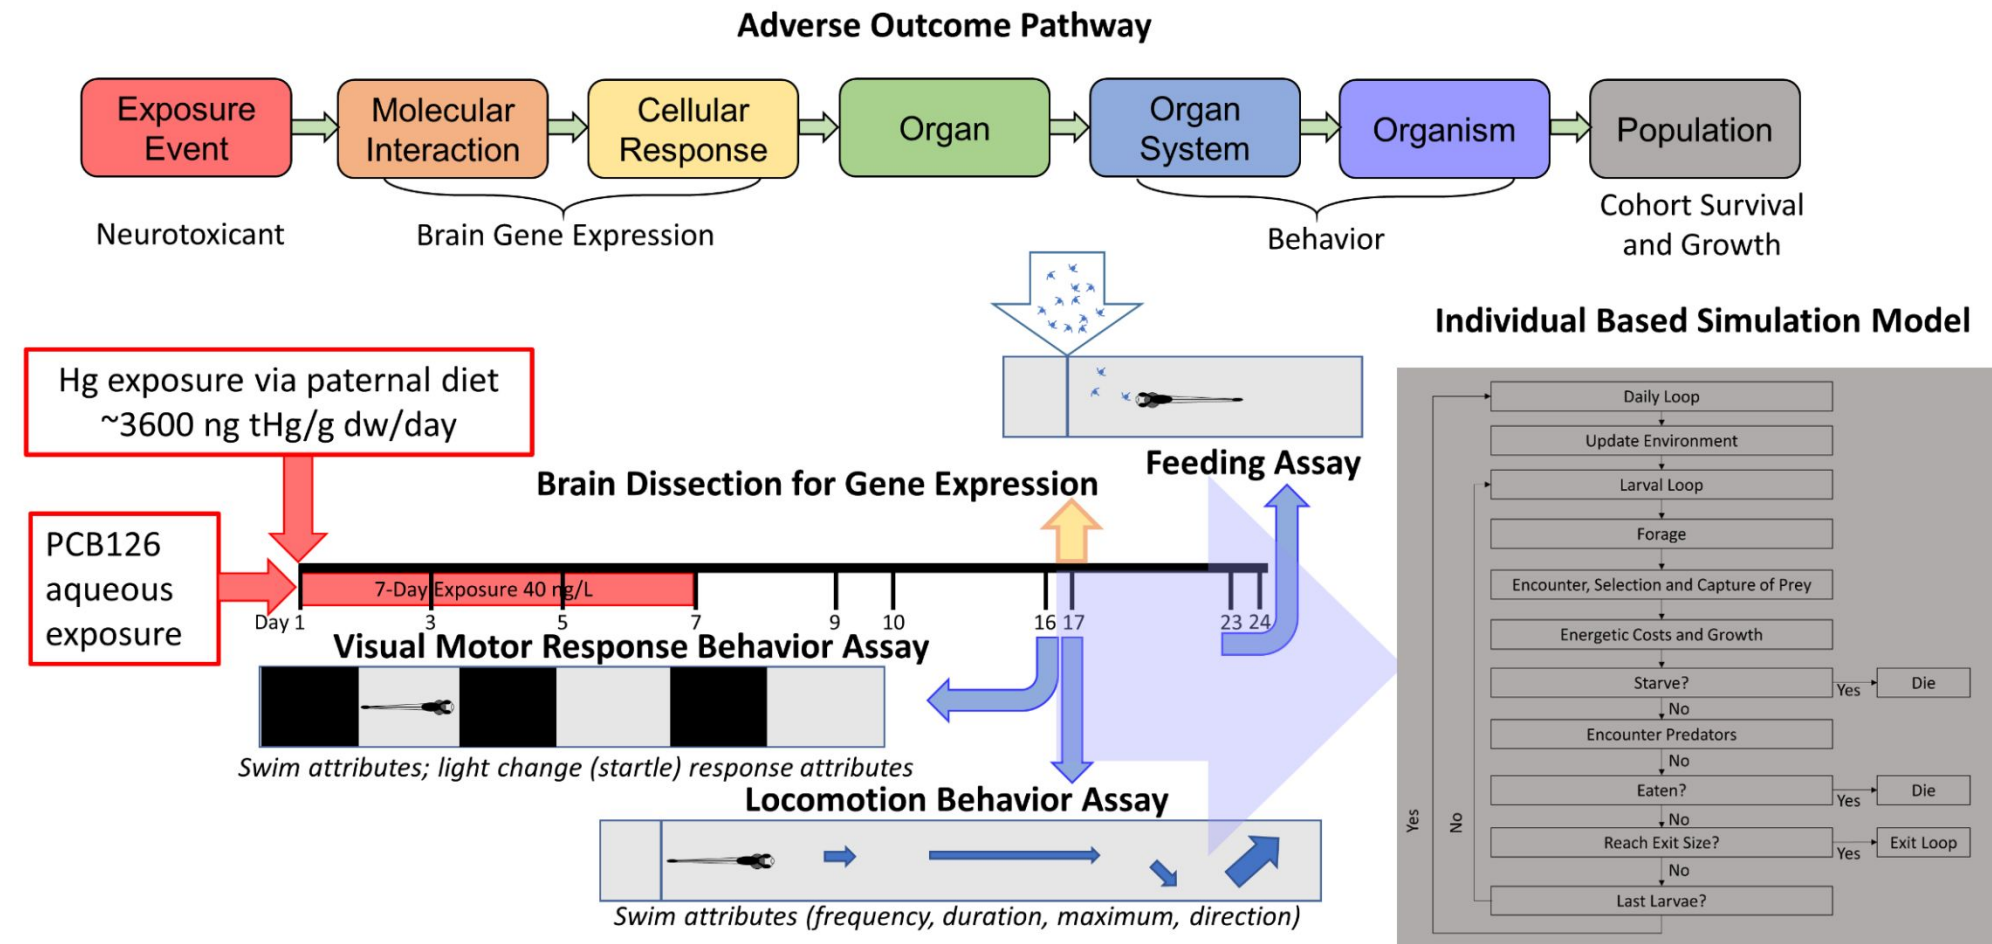

**Figure S2.** Model flow chart showing daily processes included in the generalized individual-based model to assess contaminant effects on Atlantic killifish larval cohorts.

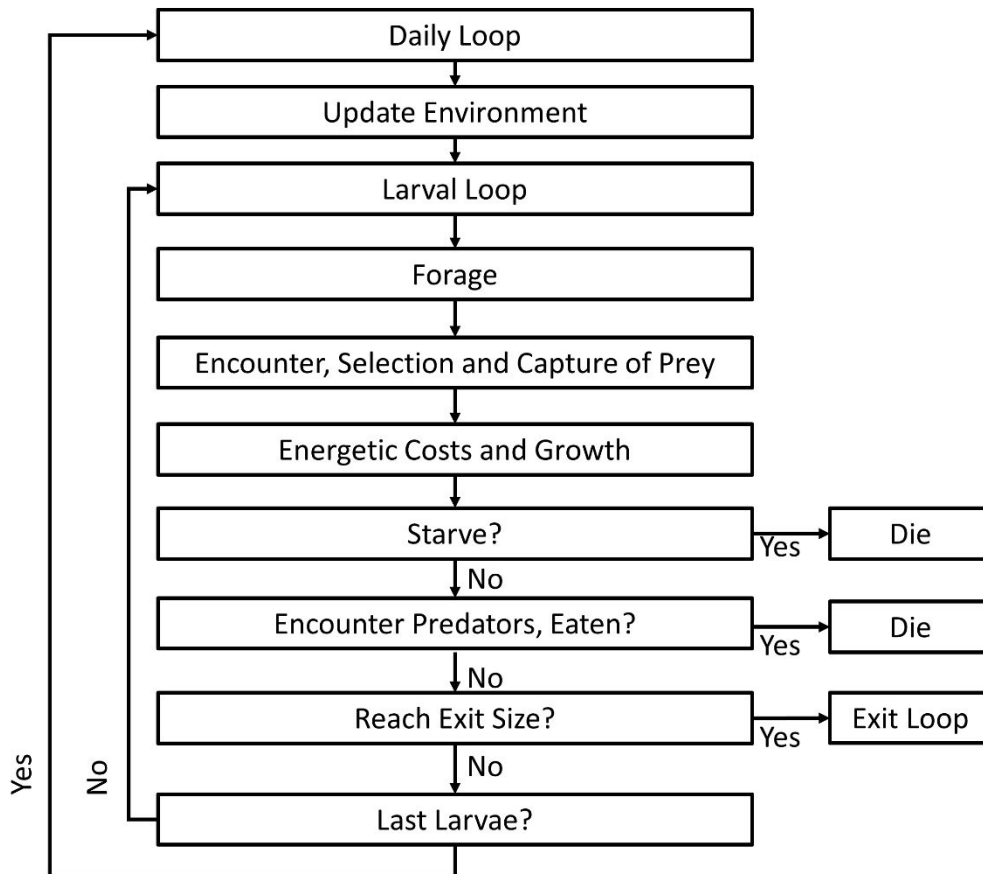

**Figure S3.** Number of best fit hidden Markov models for Atlantic killifish larvae in the locomotion assay that contained two or three different behavior states.

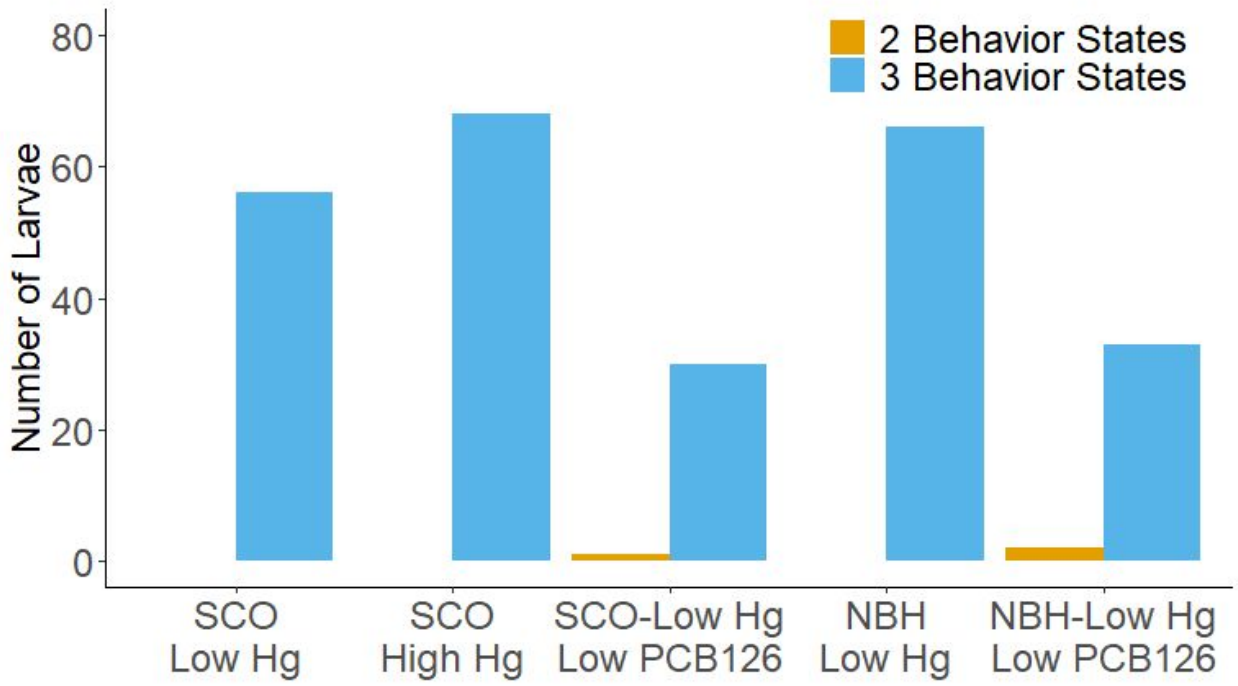

**Figure S4.** An example of the length (mm) versus simulation day for individual Scorton Creek control fish that were alive at the end of one run of a spring and summer scenario.

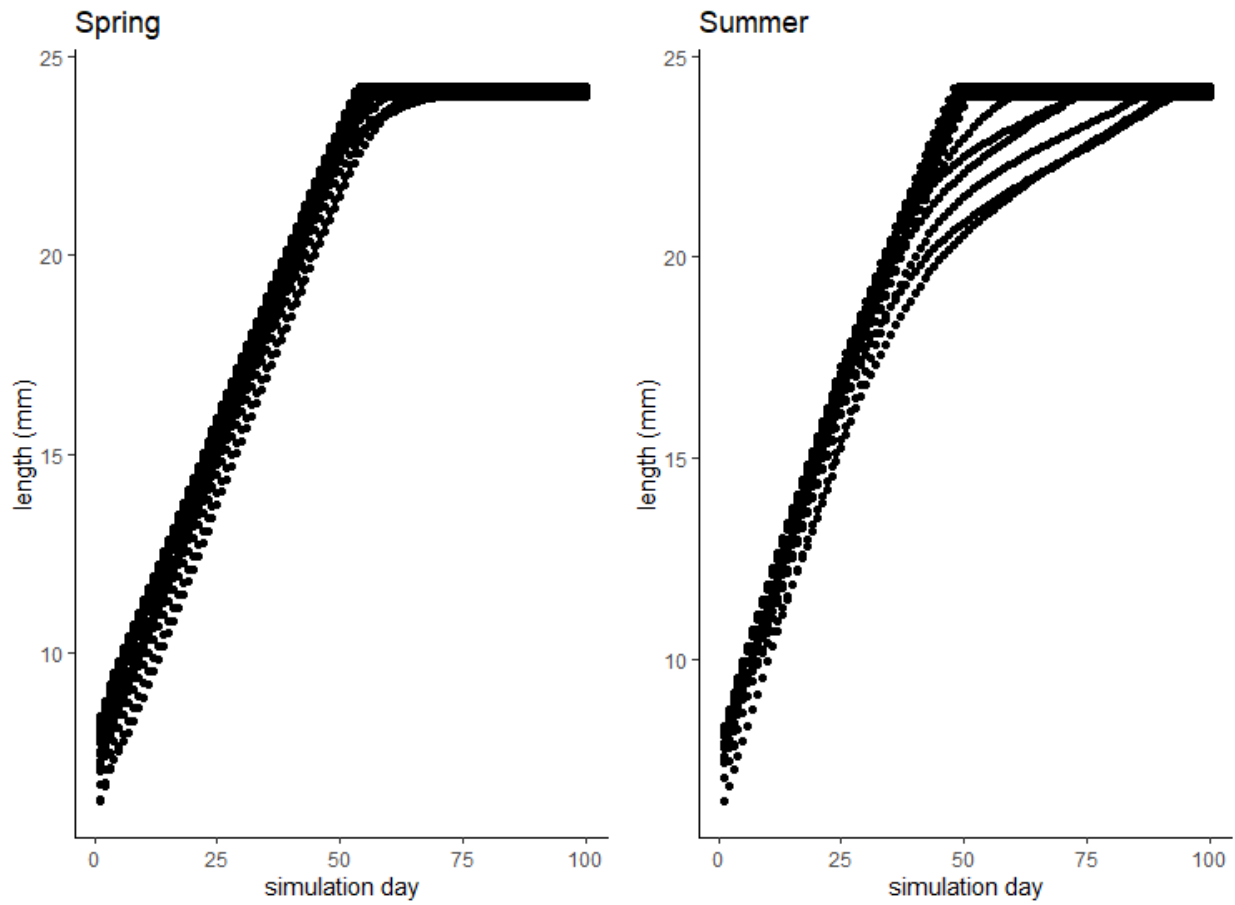



**Figure S5.** Significant mercury response patterns shared by gene expression and behavior endpoints in Scorton Creek (SCO) Atlantic killifish found in this study. Both the original and opposite behavior endpoint trends are listed. (HMM = Hidden Markov Chain model endpoint, TP = Transition Probability).

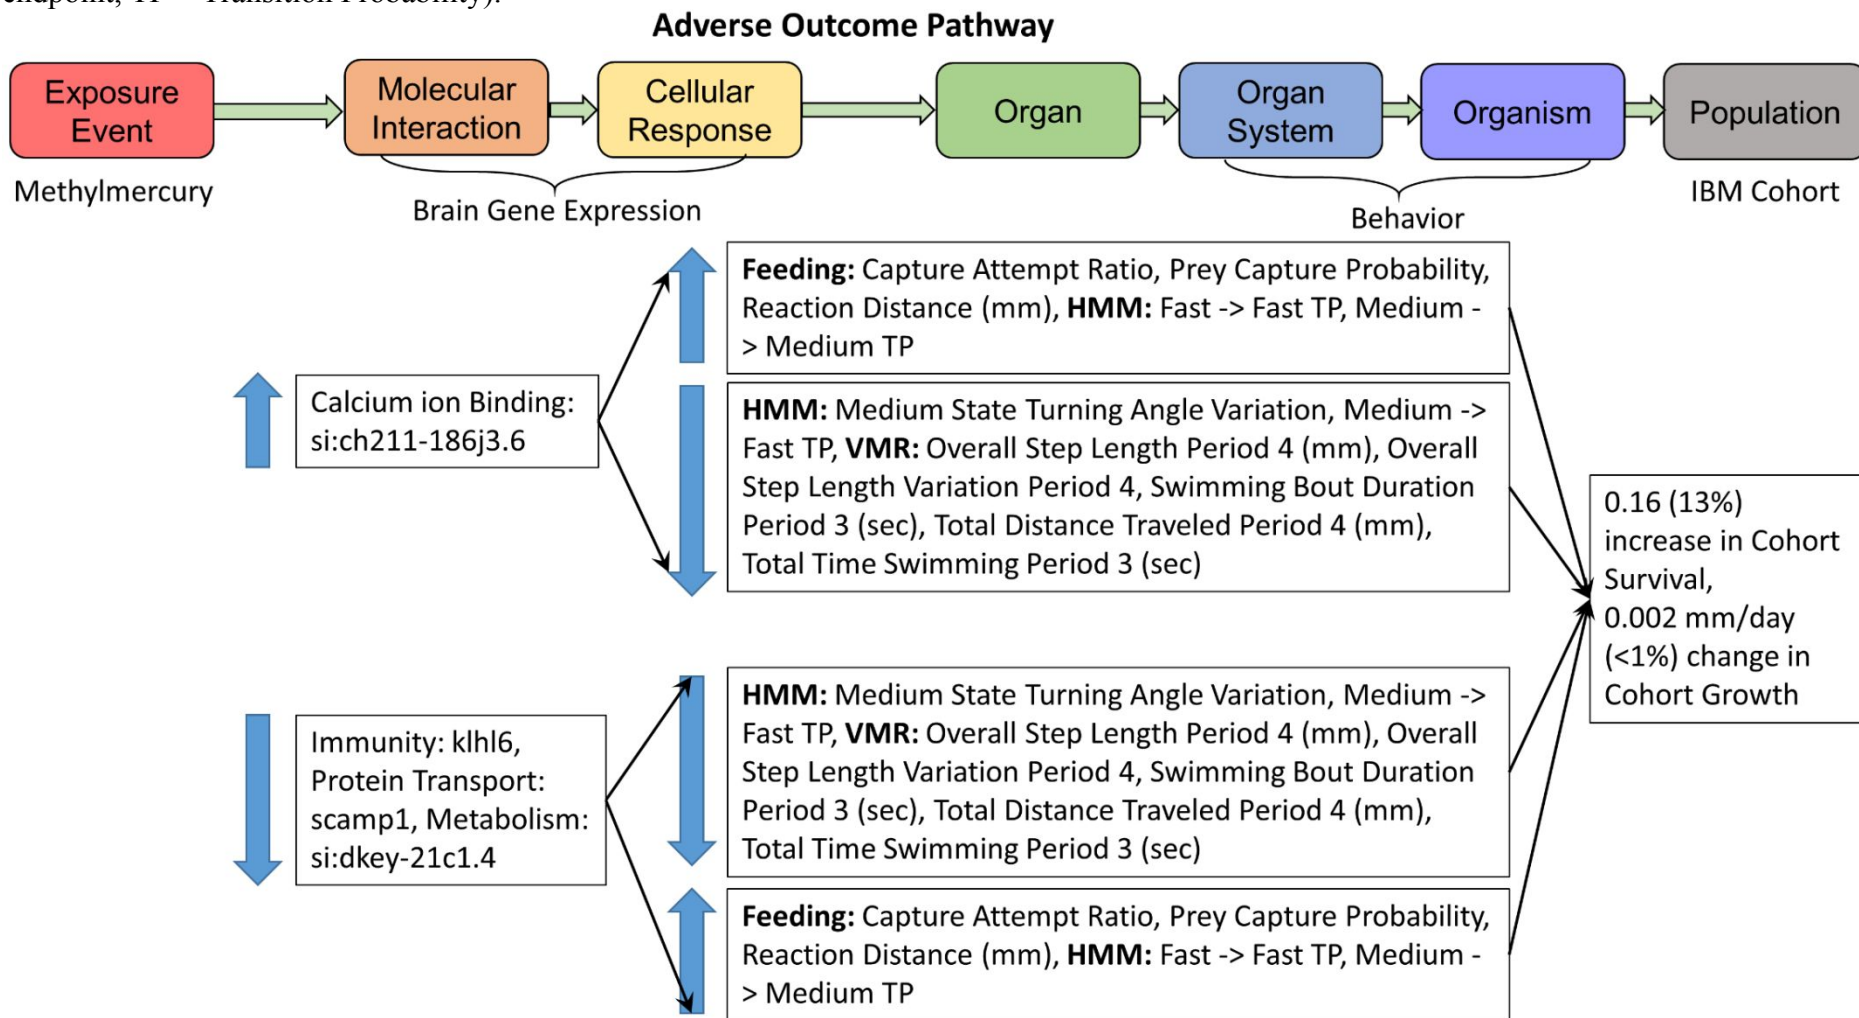

**Figure S6.** Significant PCB126 treatment patterns shared by gene expression and behavior endpoints in the New Bedford Harbor (NBH) Atlantic killifish found in this study. Both the original and opposite behavior endpoint trends are listed. (HMM = Hidden Markov Chain model endpoint, TP = Transition Probability).

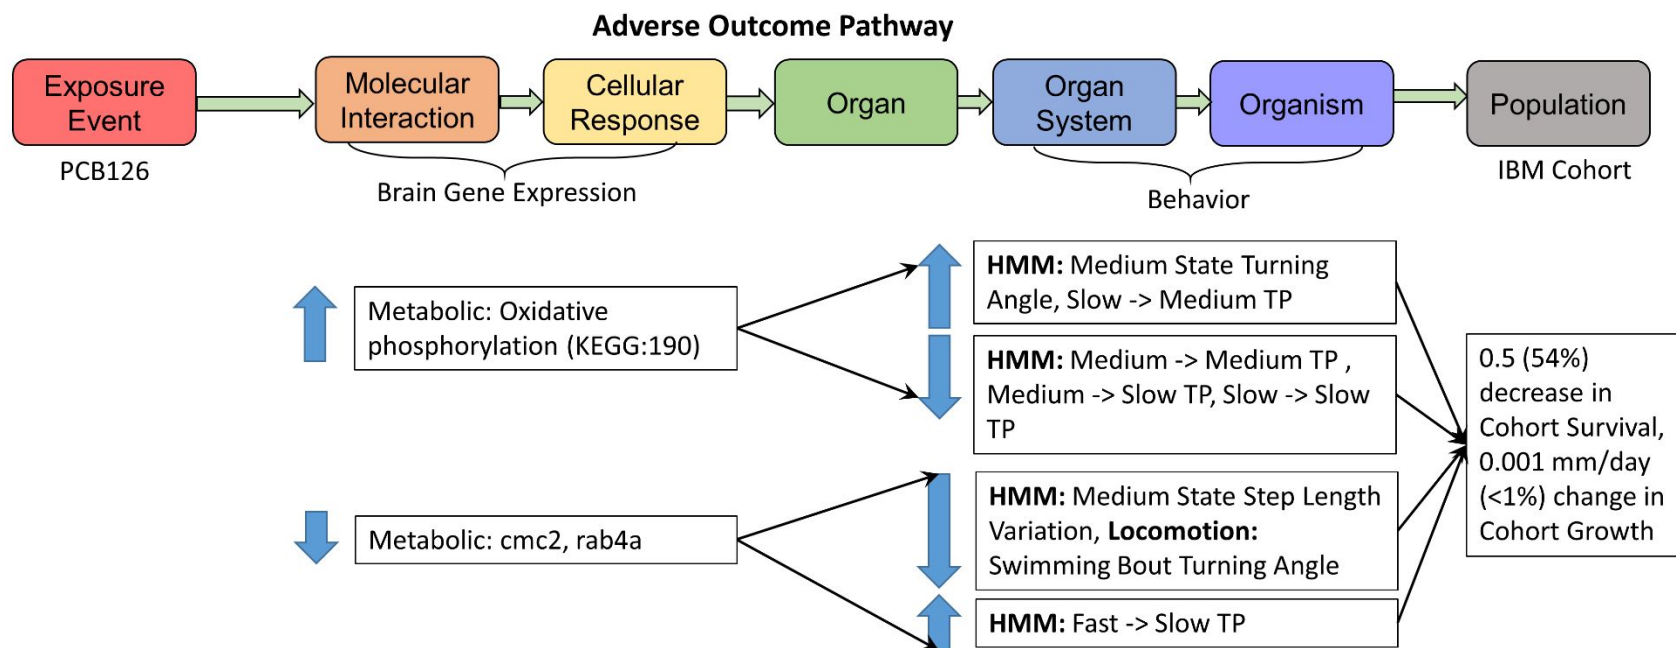

**Table S1.** Summary of the number of assays and Atlantic killifish larvae (*Fundulus heteroclitus*) used in this study

| Groups                                        | SCO-Ctrl     | SCO-Hg       | SCO-PCB     | NBH-Ctrl     | NBH-PCB      |
|-----------------------------------------------|--------------|--------------|-------------|--------------|--------------|
| VMRs                                          |              |              |             |              |              |
| Number of Assays-Larvae                       | 30           | 29           | 28          | 29           | 28           |
| Locomotion Assays                             |              |              |             |              |              |
| Number of Assays-Larvae                       | 56           | 68           | 31          | 66           | 35           |
| HMMs                                          |              |              |             |              |              |
| Number of Larvae Attempted and Fitted a Model | 56           | 68           | 31          | 66           | 35           |
| Feeding Assays                                |              |              |             |              |              |
| Number of Assays-Larvae                       | 47           | 44           | 23          | 50           | 28           |
| Total Length (mm $\pm$ SD)                    | 10.78 (0.77) | 10.63 (0.60) | 9.80 (0.98) | 10.81 (0.77) | 10.35 (0.80) |
| Number of Larvae that did not consume Artemia | 0            | 1            | 0           | 0            | 0            |

**Table S2.** Embryo treatment groups used in larval behavioral assays, where Atlantic killifish larvae originated from adults from Scorton Creek, MA (SCO) or New Bedford Harbor, MA (NBH). Larvae were fed low mercury (i.e. control) or high mercury (Hg) diets and exposed directly to PCB126 at nominal concentrations of 40 ng/L (Low PCB) or 400 ng/L (High PCB). Endpoints reported include hatching, survival and ratings for phenotypic abnormalities, including those specific to the heart. Lethal treatment groups (PCB126 400) were not used in larval behavior studies (DND = Did not determine, NA = not applicable).

| Parents | Parent or Offspring Treatment | Treatment Number | PCB126 ng/g <sup>a</sup> | Mercury ng/g  | %Embryo Survival | %Hatch | %Larval Survival | Phenotypic Abnormalities Mean Score | Heart Abnormalities Mean Score |
|---------|-------------------------------|------------------|--------------------------|---------------|------------------|--------|------------------|-------------------------------------|--------------------------------|
| SCO     | Control <sup>b</sup>          | 1                | 0                        | 9.8 ± 2.49    | 100              | 100    | 90               | 0                                   | 0                              |
|         | Hg ~3600 ng tHg/g dw/day      | 2                | NA                       | 35.09 ± 17.06 | 100              | 87.5   | 87.5             | 0.13                                | 0                              |
|         | PCB126 40 ng/L <sup>b</sup>   | 3                | 19                       | DND           | 100              | 100    | 87.5             | 0.25                                | 0.63                           |
|         | PCB126 400 ng/L <sup>b</sup>  | N/A              | 189                      | DND           | 100              | 0      | 0                | 4.6                                 | 4                              |
| NBH     | Control <sup>b</sup>          | 4                | 0                        | DND           | 100              | 100    | 100              | 0                                   | 0                              |
|         | PCB126 40 ng/L <sup>b</sup>   | 5                | 19                       | DND           | 85.71            | 85.71  | 85.71            | 0                                   | 0                              |
|         | PCB126 400 ng/L <sup>b</sup>  | N/A              | 189                      | DND           | 66.67            | 66.67  | 55.56            | 0.86                                | 0.86                           |

<sup>a</sup> Estimated using previous experiments (Nacci et al. 1999)

<sup>b</sup> Also exposed to ~300 ng tHg/g dw/day through salmon-based diet

**Table S3.** Description of behavior endpoints examined in this study.

| Behavior Endpoint                             | Definition                                                                                                                                                                                                                                       |
|-----------------------------------------------|--------------------------------------------------------------------------------------------------------------------------------------------------------------------------------------------------------------------------------------------------|
| Feeding Assay                                 |                                                                                                                                                                                                                                                  |
| Prey Capture Probability                      | The number of artemia captures divided by the total number of artemia added to the assay                                                                                                                                                         |
| Prey Handling Time (sec)                      | The number of seconds between the prey capture attempt and resuming normal activity, averaged over all feeding capture attempts during the 5 min assay                                                                                           |
| Capture Attempt Ratio                         | The total number of prey capture attempts divided by the total number of artemia added to the assay.                                                                                                                                             |
| Prey Miss Proportion                          | The number of prey capture attempts that missed the artemia divided by the total number of prey capture attempts during the assay.                                                                                                               |
| Reaction Distance (proportion of body length) | The distance (mm) between the artemia and larva when the larvae first orientates (notices) the artemia divided by the larva total length (mm), averaged over all the feeding capture attempts during the 5 minute assay.                         |
| Visual Motor Response Assay                   |                                                                                                                                                                                                                                                  |
| Startle Magnitude (mm)                        | Per frame maximum speed within 5 seconds after the startle minus the speed at the time of the startle.                                                                                                                                           |
| Startle Response time (sec)                   | Difference in time between the startle and the maximum speed traveled within 5 seconds after the startle                                                                                                                                         |
| Locomotion and VMR Assay                      |                                                                                                                                                                                                                                                  |
| Swimming Bouts (per sec)                      | The number of active swimming bouts per second. Swimming was defined as movement at least 1 mm/s for more than 5 frames (0.166 sec).                                                                                                             |
| Swimming Bout Duration (sec)                  | Duration of all swimming bouts averaged over the 5 minute period.                                                                                                                                                                                |
| Swimming Bout Speed (mm/s)                    | Per frame swimming speed averaged during a swimming bout; average bout speed averaged over the 5 minute period.                                                                                                                                  |
| Swimming Bout Turning Angle                   | Per frame turning angle averaged during a swimming bout; individual average bout turning angle averaged over the 5 minute period. Ranges from -3.14 to 3.14, where negative values indicate right turns and positive values indicate left turns. |
| Total Distance Traveled (mm)                  | Total distanced traveled during swimming bouts for the entire 5 minute assay.                                                                                                                                                                    |
| Total Time Swimming (sec)                     | Total time larvae were swimming during 5 minute test.                                                                                                                                                                                            |
| Overall Step Length (mm)                      | Per frame distance traveled during a 0.033 second period (one frame to the next) averaged over the entire 5 minute test [i.e. includes zeros when fish moved less than 1 mm/s for more than 5 frames (0.166 sec)].                               |
| Overall Step Length Variation                 | Standard deviation of distance traveled during 0.033 second period (one frame to the next).                                                                                                                                                      |
| Overall Turning Angle                         | Per frame turning angle averaged over frames when fish were swimming. Ranges from -3.14 to 3.14, where negative values indicate right turns and positive values indicate left turns.                                                             |
| Overall Turning Angle Variation               | Standard deviation of per frame turning angle during 0.033 second period (one frame to the next).                                                                                                                                                |
| HMM Model Parameters                          |                                                                                                                                                                                                                                                  |
| Step Length (mm)                              | Per frame distance traveled during a 0.033 sec period (one frame to the next) while the larvae was in each behavior state.                                                                                                                       |

|                                                                                                                                          |                                                                                                                                                                                    |
|------------------------------------------------------------------------------------------------------------------------------------------|------------------------------------------------------------------------------------------------------------------------------------------------------------------------------------|
| Step Length Variation                                                                                                                    | Standard deviation of the per frame distance traveled during 0.033 second period (one frame to the next) while in each behavior state.                                             |
| Turning Angle                                                                                                                            | Per frame turning angle while in each behavior state. Ranges from -3.14 to 3.14, where negative values indicate right turns and positive values indicate left turns.               |
| Turning Angle Variation                                                                                                                  | Angle concentration, i.e. kappa parameter in the von Mises distribution while in each behavior state.                                                                              |
| Count                                                                                                                                    | Number of frames a behavior state was performed.                                                                                                                                   |
| Slow -> Slow, Medium -> Slow, Slow -> Medium, Medium -> Medium, Fast -> Slow, Fast -> Medium, Slow -> Fast, Medium -> Fast, Fast -> Fast | Per frame transition probability from state to state (e.g. Medium -> Slow is the probability of a fish transitioning from a medium speed swimming state to a slow swimming state). |

---

**Table S4.** LDA cross validation results for different HMM behavioral states. N = 50 iterations. SD = standard deviation

| Group    | Overall Accuracy s3 |      | Slow State |      | Medium State |      | Fast State |      | Number of observations in s3 LDA | Total number of behavior states in s1 and s2 | Number of renamed state ID in s1 and s2 | Number of larvae with s3 | Number of larvae with s2 | Number of larvae with s1 |
|----------|---------------------|------|------------|------|--------------|------|------------|------|----------------------------------|----------------------------------------------|-----------------------------------------|--------------------------|--------------------------|--------------------------|
|          | Mean                | SD   | Mean       | SD   | Mean         | SD   | Mean       | SD   |                                  |                                              |                                         |                          |                          |                          |
| NBH-Ctrl | 1                   | 0.01 | 1.00       | 0.00 | 1.00         | 0.00 | 0.98       | 0.03 | 198                              | 0                                            | 0                                       | 66                       | 0                        | 0                        |
| NBH-PCB  | 1                   | 0.00 | 1.00       | 0.00 | 1.00         | 0.00 | 1.00       | 0.00 | 108                              | 4                                            | 1                                       | 36                       | 2                        | 0                        |
| SCO-Ctrl | 1.00                | 0.10 | 1.00       | 0.01 | 1.00         | 0.01 | 0.99       | 0.02 | 168                              | 0                                            | 0                                       | 56                       | 0                        | 0                        |
| SCO-Hg   | 0.96                | 0.03 | 0.98       | 0.03 | 1.00         | 0.00 | 0.90       | 0.07 | 204                              | 0                                            | 0                                       | 68                       | 0                        | 0                        |
| SCO-PCB  | 0.99                | 0.02 | 1.00       | 0.00 | 0.98         | 0.05 | 0.97       | 0.06 | 90                               | 2                                            | 0                                       | 30                       | 1                        | 0                        |

**Table S5.** Model summary for each behavioral endpoint.

| Parameter                       | Transformation          | Distribution | Number of |        |            | Burn-In | Thin | Sample  |
|---------------------------------|-------------------------|--------------|-----------|--------|------------|---------|------|---------|
|                                 |                         |              | Larvae    | Chains | Iterations |         |      |         |
| Feeding Assay                   |                         |              |           |        |            |         |      |         |
| Prey Capture Probability        | $\log(y/(1-y))$         | Logistic     | 192       | 3      | 55000      | 15000   | 20   | 120000  |
| Prey Handling Time              | $(y+1)^{-2.1}, y*100$   | Normal       | 191       | 3      | 30000      | 10000   | 10   | 60000   |
| Capture Attempt Ratio           | $(y+1)^{-1.1}, y*100$   | Normal       | 192       | 3      | 30000      | 10000   | 10   | 60000   |
| Prey Miss Proportion            | $\log(y/(1-y))$         | Logistic     | 192       | 3      | 35000      | 10000   | 10   | 75000   |
| Reaction Distance (mm)          | $(y+1)^{1.5}, y*100$    | Normal       | 192       | 3      | 30000      | 10000   | 10   | 60000   |
| Locomotion Assay                |                         |              |           |        |            |         |      |         |
| Swimming Bouts (per sec)        | $(y+1)^{3.85}, y*100$   | Normal       | 256       | 3      | 165000     | 45000   | 20   | 360000  |
| Swimming Bout Duration (sec)    | $(y+1)^{-3.3}, y*100$   | Normal       | 256       | 3      | 80000      | 50000   | 20   | 90000   |
| Swimming Bout Speed (mm/s)      | $(y+1)^{-1}, y*1000$    | Normal       | 256       | 3      | 175000     | 35000   | 20   | 420000  |
| Swimming Bout Turning           |                         |              |           |        |            |         |      |         |
| Angle                           | $(y+1)^{2.59}, y*1000$  | Normal       | 256       | 3      | 620000     | 50000   | 15   | 1710000 |
| Total Distance Traveled (mm)    | $(y+1)^{0.22}, y*100$   | Normal       | 256       | 3      | 210000     | 25000   | 20   | 555000  |
| Total Time Swimming (sec)       | $(y+1)^{0.8}$           | Normal       | 256       | 3      | 805000     | 35000   | 20   | 2310000 |
| Overall Step Length (mm)        | $(y+1)^{-6.7}, y*100$   | Normal       | 256       | 3      | 375000     | 45000   | 30   | 990000  |
| Overall Step Length Variation   | $(y+1)^{-3.7}, y*100$   | Normal       | 256       | 3      | 80000      | 40000   | 20   | 120000  |
| Overall Turning Angle           | $(y+1)^{0.25}, y*1000$  | Normal       | 256       | 3      | 60000      | 40000   | 15   | 60000   |
| Overall Turning Angle Variation | $(y+1)^{-1.2}, y*100$   | Normal       | 256       | 3      | 90000      | 40000   | 20   | 150000  |
| HMM Model Parameters            |                         |              |           |        |            |         |      |         |
| Slow State                      |                         |              |           |        |            |         |      |         |
| Count                           | $(y+1)^{1.41}$          | Normal       | 256       | 3      | 60000      | 40000   | 10   | 60000   |
| Medium State                    |                         |              |           |        |            |         |      |         |
| Step Length (mm)                | $(y+1)^{-30}, y*100000$ | Normal       | 255       | 3      | 115000     | 40000   | 20   | 225000  |
| Step Length Variation           | $(y+1)^{-30}, y*100$    | Normal       | 255       | 3      | 60000      | 40000   | 10   | 60000   |
| Turning Angle                   | $y*10$                  | Normal       | 255       | 3      | 100000     | 40000   | 20   | 180000  |
| Turning Angle Variation         | $(y+1)^{-0.65}, y*100$  | Normal       | 255       | 3      | 110000     | 40000   | 20   | 210000  |
| Count                           | $(y+1)^{0.05}, y*100$   | Normal       | 255       | 3      | 60000      | 40000   | 15   | 60000   |
| Fast State                      |                         |              |           |        |            |         |      |         |



|                                |                                |             |     |   |        |       |    |         |
|--------------------------------|--------------------------------|-------------|-----|---|--------|-------|----|---------|
| Step Length (mm)               | $(y+1)^{-4.3}, y*1000$         | Normal      | 254 | 3 | 150000 | 40000 | 20 | 330000  |
| Step Length Variation          | $(y+1)^{-6.4}, y*100$          | Normal      | 254 | 3 | 60000  | 40000 | 15 | 60000   |
| Turning Angle                  | $y*10$                         | Normal      | 254 | 3 | 80000  | 60000 | 15 | 60000   |
| Turning Angle Variation        | $(y+1)^{0.2}, y*100$           | Normal      | 254 | 3 | 80000  | 40000 | 20 | 120000  |
| Count                          | NA                             | Normal      | 254 | 3 | 265000 | 40000 | 30 | 675000  |
| State Transition Probabilities |                                |             |     |   |        |       |    |         |
| Slow -> Slow                   | $\text{asin}(\sqrt{y}), y*100$ | Normal      | 256 | 3 | 80000  | 50000 | 10 | 90000   |
| Medium -> Slow                 | $y*100$                        | Normal      | 255 | 3 | 485000 | 55000 | 20 | 1290000 |
| Slow -> Medium                 | $\text{asin}(\sqrt{y}), y*100$ | Student's T | 255 | 3 | 75000  | 40000 | 20 | 105000  |
| Medium -> Medium               | $y*100$                        | Normal      | 255 | 3 | 125000 | 50000 | 20 | 225000  |
| Fast -> Slow                   | $(y+1)^{-71.2}, y*100$         | Student's T | 254 | 3 | 60000  | 30000 | 10 | 90000   |
| Fast -> Medium                 | $(y+1)^{-5.85}, y*100$         | Normal      | 253 | 3 | 110000 | 50000 | 20 | 180000  |
| Slow -> Fast                   | $\text{asin}(\sqrt{y}), y*100$ | Normal      | 254 | 3 | 85000  | 55000 | 15 | 90000   |
| Medium -> Fast                 | $(y+1)^{-5.1}, y*100$          | Normal      | 253 | 3 | 195000 | 45000 | 20 | 450000  |
| Fast -> Fast                   | $(y+1)^{8.6}$                  | Normal      | 254 | 3 | 265000 | 55000 | 20 | 630000  |
| VMR Assay                      |                                |             |     |   |        |       |    |         |
| Period 1, Dark to Light        |                                |             |     |   |        |       |    |         |
| Startle Magnitude (mm)         | $(y+1)^{0.18}, y*100$          | Normal      | 144 | 3 | 85000  | 40000 | 15 | 135000  |
| Startle Time (sec)             | $(y+1)^{-0.96}, y*100$         | Normal      | 144 | 3 | 80000  | 40000 | 10 | 120000  |
| Period 2, Light to Dark        |                                |             |     |   |        |       |    |         |
| Startle Magnitude (mm)         | $(y+1)^{-0.18}, y*1000$        | Normal      | 144 | 3 | 90000  | 40000 | 15 | 150000  |
| Startle Time (sec)             | $(y+1)^{0.04}, y*1000$         | Normal      | 144 | 3 | 60000  | 40000 | 15 | 60000   |
| Period 3, Dark to Light        |                                |             |     |   |        |       |    |         |
| Startle Magnitude (mm)         | $(y+1)^{0.45}, y*1000$         | Normal      | 144 | 3 | 130000 | 40000 | 20 | 270000  |
| Startle Time (sec)             | $(y+1)^{-1}, y*100$            | Normal      | 144 | 3 | 85000  | 40000 | 20 | 135000  |
| Period 4, Light to Dark        |                                |             |     |   |        |       |    |         |
| Startle Magnitude (mm)         | $(y+1)^{-0.14}, y*1000$        | Normal      | 144 | 3 | 100000 | 40000 | 20 | 180000  |
| Startle Time (sec)             | $(y+1)^{-0.58}, y*100$         | Normal      | 144 | 3 | 95000  | 40000 | 10 | 165000  |
| Period 1, Light                |                                |             |     |   |        |       |    |         |
| Swimming Bouts (per sec)       | $(y+1)^{4.87}, y*10$           | Normal      | 144 | 3 | 120000 | 45000 | 20 | 225000  |
| Swimming Bout Duration (sec)   | $(y+1)^{-5.3}, y*1000$         | Normal      | 144 | 3 | 100000 | 45000 | 20 | 165000  |

|                                 |                          |        |     |   |        |       |    |        |
|---------------------------------|--------------------------|--------|-----|---|--------|-------|----|--------|
| Swimming Bout Speed (mm/s)      | $(y+1)^{-0.75}, y*10000$ | Normal | 144 | 3 | 70000  | 40000 | 25 | 90000  |
| Swimming Bout Turning Angle     | $(y+1)^{2.25}, y*1000$   | Normal | 144 | 3 | 60000  | 40000 | 15 | 60000  |
| Total Distance Traveled (mm)    | $(y+1)^{0.025}, y*1000$  | Normal | 144 | 3 | 55000  | 35000 | 20 | 60000  |
| Total Time Swimming (sec)       | $(y+1)^{0.65}, y*10$     | Normal | 144 | 3 | 150000 | 55000 | 20 | 285000 |
| Overall Step Length (mm)        | $(y+1)^{-9.15}, y*1000$  | Normal | 144 | 3 | 130000 | 45000 | 15 | 255000 |
| Overall Step Length Variation   | $(y+1)^{-4.37}, y*1000$  | Normal | 144 | 3 | 130000 | 55000 | 20 | 225000 |
| Overall Turning Angle           | $(y+1)^{5.7}, y*100$     | Normal | 144 | 3 | 90000  | 40000 | 20 | 150000 |
| Overall Turning Angle Variation | $(y+1)^{-0.34}, y*1000$  | Normal | 144 | 3 | 100000 | 40000 | 20 | 180000 |
| Period 2, Dark                  |                          |        |     |   |        |       |    |        |
| Swimming Bouts (per sec)        | $(y+1)^{4.1}, y*10$      | Normal | 144 | 3 | 150000 | 40000 | 20 | 330000 |
| Swimming Bout Duration (sec)    | $(y+1)^{-4.9}, y*1000$   | Normal | 144 | 3 | 75000  | 55000 | 15 | 60000  |
| Swimming Bout Speed (mm/s)      | $(y+1)^{0.45}, y*1000$   | Normal | 144 | 3 | 70000  | 40000 | 15 | 90000  |
| Swimming Bout Turning Angle     | $(y+1)^{12.9}, y*10000$  | Normal | 144 | 3 | 60000  | 40000 | 15 | 60000  |
| Total Distance Traveled (mm)    | $(y+1)^{0.77}$           | Normal | 144 | 3 | 65000  | 35000 | 20 | 90000  |
| Total Time Swimming (sec)       | $(y+1)^{2.5}, y/10000$   | Normal | 144 | 3 | 60000  | 40000 | 10 | 60000  |
| Overall Step Length (mm)        | $(y+1)^{-0.45}, y*1000$  | Normal | 144 | 3 | 80000  | 40000 | 15 | 120000 |
| Overall Step Length Variation   | $(y+1)^{-2.6}, y*1000$   | Normal | 144 | 3 | 85000  | 55000 | 25 | 90000  |
| Overall Turning Angle           | $(y+1)^{10.2}, y*100$    | Normal | 144 | 3 | 60000  | 40000 | 15 | 60000  |
| Overall Turning Angle Variation | $(y+1)^{-1.17}, y*1000$  | Normal | 144 | 3 | 70000  | 40000 | 20 | 90000  |
| Period 3, Light                 |                          |        |     |   |        |       |    |        |
| Swimming Bouts (per sec)        | $(y+1)^{4.35}$           | Normal | 144 | 3 | 60000  | 40000 | 15 | 60000  |
| Swimming Bout Duration (sec)    | $(y+1)^{-8.4}, y*1000$   | Normal | 144 | 3 | 120000 | 45000 | 20 | 225000 |

|                                    |                               |        |     |   |        |       |    |         |
|------------------------------------|-------------------------------|--------|-----|---|--------|-------|----|---------|
| Swimming Bout Speed<br>(mm/s)      | $(y+1)^{-2.1}, y*10000$       | Normal | 144 | 3 | 85000  | 60000 | 25 | 75000   |
| Swimming Bout Turning<br>Angle     | $(y+1)^{1.8}, y*1000$         | Normal | 144 | 3 | 65000  | 40000 | 15 | 75000   |
| Total Distance Traveled<br>(mm)    | $(y+1)^{-0.01},$<br>$y*10000$ | Normal | 144 | 3 | 55000  | 35000 | 10 | 60000   |
| Total Time Swimming<br>(sec)       | $(y+1)^{0.66}, y*10$          | Normal | 144 | 3 | 125000 | 55000 | 20 | 210000  |
| Overall Step Length (mm)           | $(y+1)^{-11}, y*1000$         | Normal | 144 | 3 | 150000 | 40000 | 20 | 330000  |
| Overall Step Length<br>Variation   | $(y+1)^{-7.7}, y*1000$        | Normal | 144 | 3 | 125000 | 55000 | 20 | 210000  |
| Overall Turning Angle              | $(y+1)^{3.6}, y*100$          | Normal | 144 | 3 | 60000  | 40000 | 15 | 60000   |
| Overall Turning Angle<br>Variation | $(y+1)^{0.6}, y*1000$         | Normal | 144 | 3 | 65000  | 40000 | 20 | 75000   |
| Period 4, Dark                     |                               |        |     |   |        |       |    |         |
| Swimming Bouts (per sec)           | $(y+1)^4$                     | Normal | 144 | 3 | 120000 | 40000 | 20 | 240000  |
| Swimming Bout Duration<br>(sec)    | $(y+1)^{-7.93}, y*1000$       | Normal | 144 | 3 | 95000  | 40000 | 20 | 165000  |
| Swimming Bout Speed<br>(mm/s)      | $(y+1)^{0.7}, y*100$          | Normal | 144 | 3 | 120000 | 40000 | 20 | 240000  |
| Swimming Bout Turning<br>Angle     | $(y+1)^{1.84}, y*1000$        | Normal | 144 | 3 | 95000  | 40000 | 20 | 165000  |
| Total Distance Traveled<br>(mm)    | $(y+1)^{0.8}$                 | Normal | 144 | 3 | 75000  | 40000 | 20 | 105000  |
| Total Time Swimming<br>(sec)       | $(y+1)^{2.53}, y/1000$        | Normal | 144 | 3 | 125000 | 40000 | 20 | 255000  |
| Overall Step Length (mm)           | $(y+1)^{-0.32}, y*1000$       | Normal | 144 | 3 | 130000 | 40000 | 20 | 270000  |
| Overall Step Length<br>Variation   | $(y+1)^{-1.55}, y*1000$       | Normal | 144 | 3 | 400000 | 45000 | 20 | 1065000 |
| Overall Turning Angle              | $(y+1)^{1.6}, y*1000$         | Normal | 144 | 3 | 140000 | 40000 | 20 | 300000  |
| Overall Turning Angle<br>Variation | $(y+1)^{-1.4}, y*1000$        | Normal | 144 | 3 | 110000 | 40000 | 20 | 210000  |

**Table S6.** Distributions and priors for parameters in models used to determine differences in treatments for locomotion behavior responses.

| Model<br>Table | Residual                                                            | Residual Variance                                                               | Batch Effect                                                        | Batch Effect Variance                                                       |
|----------------|---------------------------------------------------------------------|---------------------------------------------------------------------------------|---------------------------------------------------------------------|-----------------------------------------------------------------------------|
| S6             | $\varepsilon \sim \text{Normal}(0, \sigma_\varepsilon^2)$           | $\frac{1}{\sigma_\varepsilon^2} = \tau_j \sim I - \text{Gamma}(0.0001, 0.0001)$ | $\varepsilon \sim \text{Normal}(0, \sigma_\varepsilon^2)$           | $\frac{1}{\sigma_\varepsilon^2} = \tau_j \sim I - \text{Gamma}(0.01, 0.01)$ |
| S7             | $\varepsilon \sim \text{Normal}(0, \sigma_\varepsilon^2)$           | $\sqrt{\sigma_\varepsilon^2} = \sigma_\varepsilon \sim U(0, 01, 1000)$          | $\varepsilon \sim \text{Normal}(0, \sigma_\varepsilon^2)$           | $\sqrt{\sigma_\varepsilon^2} = \sigma_\varepsilon \sim U(0, 01, 1000)$      |
| S8             | $\varepsilon \sim \text{Student's } T(0, \sigma_\varepsilon^2, df)$ | $\frac{1}{\sigma_\varepsilon^2} = \tau_j \sim I - \text{Gamma}(0.0001, 0.0001)$ | $\varepsilon \sim \text{Student's } T(0, \sigma_\varepsilon^2, df)$ | $\frac{1}{\sigma_\varepsilon^2} = \tau_j \sim I - \text{Gamma}(0.01, 0.01)$ |

**Table S7.** Normal distribution OpenBUGS model containing treatment and time of assay effects and a random batch effect used to analyze locomotion behavior endpoints.

```

#inits<-function(){
# list(batch.eff=runif(N2,-1000,1000),tau=runif(1,0,10),tau.a=runif(1,0,10))}
#inits()
model;
{
  for(i in 1:N){
    y[i]~dnorm(mu[i],tau)
    mu[i]<-mean+trt.eff[trt[i]]+time[i]*beta_mfn+batch.eff[batchid[i]]
  }
  mean~dnorm(0,1.0E-6)
#make covariate effect priors
  #time
  beta_mfn~dnorm(0,0.0001)
#make fixed main effect priors
  trt.eff[1]<-0
  for (i in 2:5){
    trt.eff[i]~dnorm(0,1.0E-6)
  }
#make random effect of batch priors
  for (i in 1:N2){
    batch.eff[i]~dnorm(0,tau.a)
  }
#predict estimates
#cell means models
  for(j in 1:5){
    Trt.mean[j]<-mean+trt.eff[j]
  }
#initial values
  var<-1/tau
  var.a<-1/tau.a
  tau~dgamma(0.0001,0.0001)
  tau.a~dgamma(0.01,0.01)
#difference calculations
  trt1<-Trt.mean[1]#sco salmon-fed ctl
  trt2<-Trt.mean[2]#sco tuna/hg fed
  trt3<-Trt.mean[3]#sco salmon-fed pcb40
  trt4<-Trt.mean[4]#nbh salmon-fed ctl
  trt5<-Trt.mean[5]#nbh salmon-fed pcb40
  diftrt2_1<-trt2-trt1
  pvaltrt2_1<-step(diftrt2_1)
  diftrt3_1<-trt3-trt1
  pvaltrt3_1<-step(diftrt3_1)
  diftrt3_2<-trt3-trt2
  pvaltrt3_2<-step(diftrt3_2)
  diftrt4_1<-trt4-trt1
  pvaltrt4_1<-step(diftrt4_1)

```

```

diftrt5_4<-trt5-trt4
pvaltrt5_4<-step(diftrt5_4)
diftrt3_5<-trt3-trt5
pvaltrt3_5<-step(diftrt3_5)
#ratio calculations
ratiostrt2_1<-trt2/trt1
ratiostrt3_1<-trt3/trt1
ratiostrt3_2<-trt3/trt2
ratiostrt4_1<-trt4/trt1
ratiostrt5_4<-trt5/trt4
ratiostrt3_5<-trt3/trt5
#posterior model checking, generate new obs based on model params mu, tau. assume normal dist
for( i in 1 : N ) {
  ypred[i] ~ dnorm(mu[i],tau)
}
#generate individual level predictions
ypred_1 ~ dnorm(trt1,tau)#approximation of the individual observation, using average for other factors in
the model.
ypred_2 ~ dnorm(trt2,tau)#randomly selected individual
ypred_3 ~ dnorm(trt3,tau)
ypred_4 ~ dnorm(trt4,tau)
ypred_5 ~ dnorm(trt5,tau)
#compute residuals using the kurtosis formula for both orig data (e) and rep data
for( i in 1 : N ) {
  e[i]<-y[i]-mu[i]
}
SSE<-inprod(e[],e[])#sum of squares which is e squared
ku<-sum(e[]) #sum up all values, there is one for each data point
kpred<-sum(ypred[])
difs<-kpred-ku #find difference
difpval<-step(difs) #count how many times the rep data is larger than orig data
}

```

**Table S8.** Normal distribution OpenBUGS model containing treatment and time of assay effects and a random batch effect using uniform tau prior used to analyze locomotion behavior endpoints.

```

#inits<-function(){
# list(batch.eff=runif(N2,-1000,1000),sdev=runif(1,0.01,1000),sdev.a=runif(1,0.01,1000))}
#inits()
model;
{
  for(i in 1:N){
    y[i]~dnorm(mu[i],tau)
    mu[i]<-mean+trt.eff[trt[i]]+time[i]*betta_mfn+batch.eff[batchid[i]]
  }
  mean~dnorm(0,1.0E-6)
#make covariate effect priors
#time
  betta_mfn~dnorm(0,0.0001)
#make fixed main effect priors
  trt.eff[1]<-0
  for (i in 2:5){
    trt.eff[i]~dnorm(0,1.0E-6)
  }
#make random effect of batch priors
  for (i in 1:N2){
    batch.eff[i]~dnorm(0,tau.a)
  }
#predict estimates
#cell means models
  for(j in 1:5){
    Trt.mean[j]<-mean+trt.eff[j]
  }
#initial values
  sdev~dunif(0.01,1000)
  sdev.a~dunif(0.01,1000)
  var<-pow(sdev,2)
  var.a<-pow(sdev.a,2)
  tau<-pow(sdev,-2)
  tau.a<-pow(sdev.a,-2)
#difference calculations
  trt1<-Trt.mean[1]#sco salmon-fed ctl
  trt2<-Trt.mean[2]#sco tuna/hg fed
  trt3<-Trt.mean[3]#sco salmon-fed pcb40
  trt4<-Trt.mean[4]#nbh salmon-fed ctl
  trt5<-Trt.mean[5]#nbh salmon-fed pcb40
  diftrt2_1<-trt2-trt1
  pvaltrt2_1<-step(diftrt2_1)
  diftrt3_1<-trt3-trt1
  pvaltrt3_1<-step(diftrt3_1)
  diftrt3_2<-trt3-trt2
  pvaltrt3_2<-step(diftrt3_2)
  diftrt4_1<-trt4-trt1

```

```

    pvaltrt4_1<-step(diftrt4_1)
    diftrt5_4<-trt5-trt4
    pvaltrt5_4<-step(diftrt5_4)
    diftrt3_5<-trt3-trt5
    pvaltrt3_5<-step(diftrt3_5)
#ratio calculations
    ratiotrt2_1<-trt2/trt1
    ratiotrt3_1<-trt3/trt1
    ratiotrt3_2<-trt3/trt2
    ratiotrt4_1<-trt4/trt1
    ratiotrt5_4<-trt5/trt4
    ratiotrt3_5<-trt3/trt5
#posterior model checking, generate new obs based on model params mu, tau. assume normal dist
for( i in 1 : N ) {
  ypred[i] ~ dnorm(mu[i],tau)
}
#generate individual level predictions
  ypred_1 ~ dnorm(trt1,tau)#approximation of the individual observation
  ypred_2 ~ dnorm(trt2,tau)#randomly selected individual
  ypred_3 ~ dnorm(trt3,tau)
  ypred_4 ~ dnorm(trt4,tau)
  ypred_5 ~ dnorm(trt5,tau)

#compute residuals using the kurtosis formula for both orig data (e) and rep data
for( i in 1 : N ) {
  e[i]<-y[i]-mu[i]
}
SSE<-inprod(e[],e[])#sum of squares which is e squared
ku<-sum(e[]) #sum up all values, there is one for each data point
kpred<-sum(ypred[])
difs<-kpred-ku #find difference
difpval<-step(difs) #count how many times the rep data is larger than orig data
}

```



**Table S9.** Student's t distribution OpenBUGS model containing treatment and time of assay main effects and a random batch effect used to analyze locomotion behavior endpoints.

```

#inits<-function(){
# list(batch.eff=runif(N2,-
1000,1000),df=runif(1,3,30),df.a=runif(1,3,30),tau=runif(1,0,10),tau.a=runif(1,0,10))}
#inits()
model;
{
  for(i in 1:N){
    y[i]~dt(mu[i],tau,df)
    mu[i]<-mean+trt.eff[trt[i]]+time[i]*beta_mfn+batch.eff[batchid[i]]
  }
  mean~dnorm(0,1.0E-6)
#make covariate effect priors
  #time
  beta_mfn~dnorm(0,0.0001)
#make fixed main effect priors
  trt.eff[1]<-0
  for (i in 2:5){
    trt.eff[i]~dnorm(0,1.0E-6)
  }
#make random effect of batch priors
  for (i in 1:N2){
    batch.eff[i]~dt(0,tau.a,df.a)
  }
#predict estimates
#cell means models
  for(j in 1:5){
    Trt.mean[j]<-mean+trt.eff[j]
  }
#initial values
  df~dunif(3,30)
  df.a~dunif(3,30)
  var<-1/tau
  var.a<-1/tau.a
  tau~dgamma(0.0001,0.0001)
  tau.a~dgamma(0.01,0.01)
#difference calculations
  trt1<-Trt.mean[1]#sco salmon-fed ctl
  trt2<-Trt.mean[2]#sco tuna/hg fed
  trt3<-Trt.mean[3]#sco salmon-fed pcb40
  trt4<-Trt.mean[4]#nbh salmon-fed ctl
  trt5<-Trt.mean[5]#nbh salmon-fed pcb40
  diftrt2_1<-trt2-trt1
  pvaltrt2_1<-step(diftrt2_1)
  diftrt3_1<-trt3-trt1
  pvaltrt3_1<-step(diftrt3_1)
  diftrt3_2<-trt3-trt2

```

```

pvaltrt3_2<-step(diftrt3_2)
diftrt4_1<-trt4-trt1
pvaltrt4_1<-step(diftrt4_1)
diftrt5_4<-trt5-trt4
pvaltrt5_4<-step(diftrt5_4)
diftrt3_5<-trt3-trt5
pvaltrt3_5<-step(diftrt3_5)
#ratio calculations
ratiostrt2_1<-trt2/trt1
ratiostrt3_1<-trt3/trt1
ratiostrt3_2<-trt3/trt2
ratiostrt4_1<-trt4/trt1
ratiostrt5_4<-trt5/trt4
ratiostrt3_5<-trt3/trt5
#posterior model checking, generate new obs based on model params mu, tau. assume normal dist
for( i in 1 : N ) {
  ypred[i] ~ dt(mu[i],tau,df)
}
#generate individual level predictions
ypred_1 ~ dt(trt1,tau,df)#approximation of the individual observation, using average for other factors in the
model.
ypred_2 ~ dt(trt2,tau,df)#randomly selected individual
ypred_3 ~ dt(trt3,tau,df)
ypred_4 ~ dt(trt4,tau,df)
ypred_5 ~ dt(trt5,tau,df)
#compute residuals using the kurtosis formula for both orig data (e) and rep data
for( i in 1 : N ) {
  e[i]<-y[i]-mu[i]
}
SSE<-inprod(e[],e[])#sum of squares which is e squared
ku<-sum(e[]) #sum up all values, there is one for each data point
kpred<-sum(ypred[])
difs<-kpred-ku #find difference
difpval<-step(difs) #count how many times the rep data is larger than orig data
}

```

**Table S10.** Normal distribution OpenBUGS model containing treatment, time of assay and days post hatch (dpf) effects used to analyze feeding behavior endpoints.

```

#inits<-function(){
# list(tau=runif(1,0,10))
#}
model;
{
  for(i in 1:N){
    y[i]~dnorm(mu[i],tau)
    mu[i]<-mean+trt.eff[trt[i]]+time[i]*beta_mfn+dpf[i]*beta_dpf
  }
  mean~dnorm(0,1.0E-6)
#make covariate effect priors
#time
beta_mfn~dnorm(0,0.0001)
#dpf
#independent gaussian priors for the linear covariate
beta_dpf~dnorm(0,0.0001)
#make fixed main effect priors
trt.eff[1]<-0
for (i in 2:5){
  trt.eff[i]~dnorm(0,1.0E-6)
}
#back transform the outputs
#cell means models
for(j in 1:5){
  Trt.mean[j]<-mean+trt.eff[j]
}
#initial values
tau~dgamma(0.0001,0.0001)
var<-1/tau
trt1<-Trt.mean[1]#sco salmon-fed ctl
trt2<-Trt.mean[2]#sco tuna/hg fed
trt3<-Trt.mean[3]#sco salmon-fed pcb40
trt4<-Trt.mean[4]#nbh salmon-fed ctl
trt5<-Trt.mean[5]#nbh salmon-fed pcb40
diftrt2_1<-trt2-trt1
pvaltrt2_1<-step(diftrt2_1)
diftrt3_1<-trt3-trt1
pvaltrt3_1<-step(diftrt3_1)
diftrt3_2<-trt3-trt2
pvaltrt3_2<-step(diftrt3_2)
diftrt4_1<-trt4-trt1
pvaltrt4_1<-step(diftrt4_1)
diftrt5_4<-trt5-trt4
pvaltrt5_4<-step(diftrt5_4)
#diftrt6_4<-trt6-trt4
#pvaltrt6_4<-step(diftrt6_4)

```

```

#diftrt6_5<-trt6-trt5
#pvaltrt6_5<-step(diftrt6_5)
diftrt3_5<-trt3-trt5
pvaltrt3_5<-step(diftrt3_5)
#ratio calculations
ratio_trt2_1<-trt2/trt1
ratio_trt3_1<-trt3/trt1
ratio_trt3_2<-trt3/trt2
ratio_trt4_1<-trt4/trt1
ratio_trt5_4<-trt5/trt4
#ratio_trt6_4<-trt6/trt4
#ratio_trt6_5<-trt6/trt5
ratio_trt3_5<-trt3/trt5
#posterior model checking, generate new obs based on model params mu, tau. assume normal dist
for( i in 1 : N ) {
  ypred[i] ~ dnorm(mu[i],tau)
}
#generate individual level predictions
ypred_1 ~ dnorm(trt1,tau)#approximation of the individual observation, using average for other factors in
the model.
ypred_2 ~ dnorm(trt2,tau)#randomly selected individual
ypred_3 ~ dnorm(trt3,tau)
ypred_4 ~ dnorm(trt4,tau)
ypred_5 ~ dnorm(trt5,tau)
#ypred_6 ~ dnorm(trt6,tau)
#compute residuals using the kurtosis formula for both orig data (e) and rep data
for( i in 1 : N ) {
  e[i]<-y[i]-mu[i]
}
SSE<-inprod(e[],e[])#sum of squares which is e squared
ku<-sum(e[]) #sum up all values, there is one for each data point
kpred<-sum(ypred[])
difs<-kpred-ku #find difference
difpval<-step(difs) #count how many times the rep data is larger than orig data
}

```

**Table S11.** Binomial distribution OpenBUGS model containing treatment, time of assay and days post hatch (dpf) effects used to analyze feeding endpoints.

```

#inits<-function(){
# list(beta_mfn~runif(1,0,5),Trt.mean~runif(5,0,5),tau~runif(1,0,10),beta_dpf~runif(1,0,5))
#}
#inits()
model
{
  for( i in 1 : N ) {
    y[i] ~ dbin(p[i],bs[i])
    e[i]~dnorm(0,tau)
    logit(p[i]) <-time[i]*beta_mfn+dpf[i]*beta_dpf+Trt.mean[trt[i]]+e[i]
  }
#set priors
  tau ~ dgamma(0.01,0.01)
  var<-1/tau
#make covariate effect priors
  #time
  beta_mfn~dnorm(0,0.0001)
  #dpf
  #independent gaussian priors for the linear covariate
  beta_dpf~dnorm(0,0.0001)
#make fixed main effect priors
  for (i in 1:5){
    Trt.mean[i]~dnorm(0,1.0E-6)
  }
#back transform the outputs
#cell means models
  for(j in 1:5){
    trt.eff[j]<-Trt.mean[j]-Trt.mean[1]
  }
#other values
  trt1<-1/(1+exp(-Trt.mean[1]))#sco salmon-fed ctl, back transformed trt mean, in the scale of the
binomial prob. the probability of being attacked by the average population. do not back transformed
  trt2<-1/(1+exp(-Trt.mean[2]))#sco tuna/hg fed
  trt3<-1/(1+exp(-Trt.mean[3]))#sco salmon-fed pcb40
  trt4<-1/(1+exp(-Trt.mean[4]))#nbh salmon-fed ctl
  trt5<-1/(1+exp(-Trt.mean[5]))#nbh salmon-fed pcb40

  diftrt2_1<-Trt.mean[2]-Trt.mean[1]#compare on linear scale logit
  pvaltrt2_1<-step(diftrt2_1)
  diftrt3_1<-Trt.mean[3]-Trt.mean[1]
  pvaltrt3_1<-step(diftrt3_1)
  diftrt3_2<-Trt.mean[3]-Trt.mean[2]
  pvaltrt3_2<-step(diftrt3_2)
  diftrt4_1<-Trt.mean[4]-Trt.mean[1]
  pvaltrt4_1<-step(diftrt4_1)
  diftrt5_4<-Trt.mean[5]-Trt.mean[4]
  pvaltrt5_4<-step(diftrt5_4)

```

```

diftrt3_5<-Trt.mean[3]-Trt.mean[5]
pvaltrt3_5<-step(diftrt3_5)
#ratio calculations
ratio_trt2_1<-trt2/trt1 #use the back transformed scale
ratio_trt3_1<-trt3/trt1
ratio_trt3_2<-trt3/trt2
ratio_trt4_1<-trt4/trt1
ratio_trt5_4<-trt5/trt4
ratio_trt3_5<-trt3/trt5
#posterior model checking, generate new obs based on model params
for( i in 1 : N ) {
  ypred[i] ~ dbin(p[i],bs[i])
}
#generate individual level predictions
#need to estimate error for each group
for(j in 1:5){
  ee[j]~dnorm(0,tau)
}
ypred_1 <- 1/(1+exp(-(Trt.mean[1]+ee[1]))) #probability of bs capture by a random individual in trt1
ypred_2 <- 1/(1+exp(-(Trt.mean[2]+ee[2])))
ypred_3 <- 1/(1+exp(-(Trt.mean[3]+ee[3])))
ypred_4 <- 1/(1+exp(-(Trt.mean[4]+ee[4])))
ypred_5 <- 1/(1+exp(-(Trt.mean[5]+ee[5])))
}

```

**Table S12.** A list of all parameters included in the individual-based model, units, equation reference and references (mm = millimeter, m = meter, d = day, g = gram, °C = Celsius, J = joule, # = count, s = sec, hr = hour, µg = microgram, O<sub>2</sub> = oxygen, W = weight, L = length, ml = milliliter).

| Variable                                                                   | Value     | Units                | Explanation                                                         | Reference                    |
|----------------------------------------------------------------------------|-----------|----------------------|---------------------------------------------------------------------|------------------------------|
| <b>Initialize larva</b>                                                    |           |                      |                                                                     |                              |
| Number of fish                                                             | 2500      | #                    | Number of larva                                                     | Smith et al. 2002            |
| Mean Length                                                                | 5.96      | mm                   | Mean length                                                         | Marteinsdottir and Able 1992 |
| Mean Stdev of Length                                                       | 0.4       | mm                   | Standard deviation of length                                        | Marteinsdottir and Able 1992 |
| Length max                                                                 | 8         | mm                   | Maximum length                                                      | Estimated                    |
| Length min                                                                 | 5         | mm                   | Minimum length                                                      | Estimated                    |
| Length at which fish exists model                                          | 24        | mm                   | Size at exit                                                        | Abraham 1985                 |
| <b>Time &amp; physical</b>                                                 |           |                      |                                                                     |                              |
| Initial day of model                                                       | 100       | day                  | Julian date                                                         |                              |
| Number of days model ran                                                   | 100       | day                  |                                                                     |                              |
| Volume                                                                     | 1000      | m <sup>3</sup>       | Volume of the aquatic habitat modeled                               |                              |
| <b>Yolk-sac growth</b>                                                     |           |                      |                                                                     |                              |
| Yolk-sac growth                                                            | 0.40      | mm/d                 | Growth of yolk-sac larvae                                           | Marteinsdottir and Able 1992 |
| Length exogenous feeding begins                                            | 4         | days                 | Days until start of feeding                                         | Estimated                    |
| W_L a parameter                                                            | 0.0000015 | g dry                | Length-weight function intercept                                    | Kneib and Parker 1991        |
| W-L b parameter                                                            | 3.25      | NA                   | Length-weight function slope                                        | Kneib and Parker 1991        |
| <b>Bioenergetics (from Deslauriers et al. 2017 unless otherwise noted)</b> |           |                      |                                                                     |                              |
| Ca                                                                         | 0.2       | g/g/d                | Intercept of the mass dependence function for consumption           |                              |
| Cb                                                                         | -0.25     | NA                   | Slope of the mass dependence function for consumption               |                              |
| CQ                                                                         | 2.22      | °C                   | Temperature-dependent coefficient of consumption (approximates Q10) |                              |
| CTO                                                                        | 27        | °C                   | Optimal temperature for consumption                                 |                              |
| CTM                                                                        | 34        | °C                   | Maximum consumption temperature                                     |                              |
| Ra                                                                         | 0.02      | gO <sub>2</sub> /g/d | Intercept of the mass dependence function for respiration           |                              |
| Rb                                                                         | -0.17     | NA                   | Slope of the mass dependence function for respiration               |                              |
| RQ                                                                         | 2         | °C                   | Temperature-dependent coefficient of respiration (approximates Q10) |                              |
| RTO                                                                        | 29        | °C                   | Optimal temperature for respiration                                 |                              |

|                                     |          |         |                                                                                   |                                                         |
|-------------------------------------|----------|---------|-----------------------------------------------------------------------------------|---------------------------------------------------------|
| RTM                                 | 36       | °C      | Maximum respiration temperature                                                   |                                                         |
| Act                                 | 1.25     | NA      | Activity multiplier on respiration                                                |                                                         |
| SDA                                 | 0.1      | NA      | Specific dynamic action coefficient                                               |                                                         |
| FA                                  | 0.1      | NA      | Egestion coefficient                                                              |                                                         |
| UA                                  | 0.06     | NA      | Excretion coefficient                                                             |                                                         |
| ED                                  | 3000     | J/g wet | Energy density of larvae                                                          |                                                         |
| Percent dry                         | 0.2      | %       | Dry to wet conversion                                                             | Estimated                                               |
| Starvation                          | 75       | %       | Probability of starvation                                                         | Letcher et al. 1996                                     |
| <b>Prey</b>                         |          |         |                                                                                   |                                                         |
| Small prey density                  | 0.0175   | #/ml    | Copepods                                                                          | Fleeger et al. 2008                                     |
| Large prey density                  | 0.008    | #/ml    | Amphipods                                                                         | Estimated but based on ostracods in Fleeger et al. 2008 |
| Small prey length                   | 0.485    | ml      | Copepods                                                                          | Fulford et al. 2006                                     |
| Large prey length                   | 0.6      | ml      | Amphipods                                                                         | Fulford et al. 2006                                     |
| Small prey mass                     | 1.215    | µg dry  | Copepods                                                                          | Fulford et al. 2006                                     |
| Large prey mass                     | 3.8      | µg dry  | Amphipods                                                                         | Fulford et al. 2006                                     |
| Large prey energy density           | 2301.2   | J/g wet | Copepods                                                                          | Hartman and Brandt 1995                                 |
| Small prey energy density           | 4125.424 | J/g wet | Amphipods                                                                         | Hartman and Brandt 1995                                 |
| <b>Foraging</b>                     |          |         |                                                                                   |                                                         |
| SSa                                 | 0.776    | mm/s    | Intercept of the fish length to swimming speed function                           | Letcher et al. 1996                                     |
| SSb                                 | 1.07     | NA      | Slope of the fish length to swimming speed function                               | Letcher et al. 1996                                     |
| Handling Time a                     | 0.264    | s       | Intercept of the handling time function relative to prey to predator length ratio | Walton et al. 1992                                      |
| Handling Time b                     | 7.0151   | NA      | Slope of the handling time function relative to prey to predator length ratio     | Walton et al. 1992                                      |
| Light                               | 12       | hr      | Active time during the day                                                        | Letcher et al. 1996                                     |
| <b>Killifish Predators (Adults)</b> |          |         |                                                                                   |                                                         |
| Number of predators                 | 200      | #       | Number of predators                                                               | Calibrated                                              |
| Mean predator length                | 45       | mm      | Mean predator length                                                              | Assigned (Age 1 size)                                   |
| Stdev predator length               | 2.5      | mm      | Standard deviation of length                                                      | Estimated                                               |
| Min predator length                 | 25.5     | mm      | Minimum length                                                                    | Estimated                                               |
| Max predator length                 | 96       | mm      | Maximum length                                                                    | Valiela et al. 1977                                     |
| Predator CTM                        | 34       | °C      | Maximum temperature for consumption                                               | Madon et al. 2001                                       |
| Predator CTO                        | 27       | °C      | Optimum temperature for consumption                                               | Madon et al. 2001                                       |



|                            |      |              |                                                                     |                        |
|----------------------------|------|--------------|---------------------------------------------------------------------|------------------------|
| Predator CQ                | 2.22 | °C           | Temperature-dependent coefficient of consumption (approximates Q10) | Madon et al. 2001      |
| Predator swimming speed    | 3    | Body Lengths | Multiplier on body lengths for distance swum in a second            | Cowan et al. 1996      |
| Predator reactive distance | 0.8  | mm           | Reactive distance multiplier                                        | Cowan et al. 1996      |
| <b>Calibration</b>         |      |              |                                                                     |                        |
| Growth                     | 0.31 | mm/d         | Change in fish length from 0-16 days post hatch                     | Nacci unpublished data |

**Table S13.** A list of all behavior parameter distributions and resulting multipliers used to assess treatment impacts in the individual based model. Posterior distributions are from the individual level predicted responses and multipliers were generated from back transformed values. N indicates this behavior was significantly lower than the control, P indicates this behavior was significantly higher than the control.

| Killifish |          |                            | Individual Level Distribution |       |         |         | Multipliers |       |         |         |
|-----------|----------|----------------------------|-------------------------------|-------|---------|---------|-------------|-------|---------|---------|
| Group     | Chemical | Variable                   | Mean                          | SD    | Minimum | Maximum | Mean        | SD    | Minimum | Maximum |
| SCO       | Control  | Prey Handling Time         | 27.89                         | 8.186 | 11.88   | 43.67   | 1.000       | 0.287 | 0.547   | 1.986   |
| SCO       | Control  | Prey Miss Proportion       | -2.674                        | 1.308 | -5.255  | -0.1185 | 1.000       | 0.110 | 0.589   | 1.105   |
| SCO       | Control  | Reaction Distance (mm)     | 167.3                         | 19.05 | 129.4   | 204.9   | 1.000       | 0.232 | 0.464   | 1.510   |
| SCO       | Control  | Swimming Bout Speed (mm/s) | 137.1                         | 27.9  | 82.41   | 191.7   | 1.000       | 0.221 | 0.644   | 1.698   |
| SCO       | Control  | Total Time Swimming (sec)  | 58.94                         | 16.72 | 26.14   | 91.75   | 0.547       | 0.168 | 0.194   | 0.943   |
| SCO       | MeHg     | Prey Handling Time         | 28.51                         | 8.2   | 12.4    | 44.64   | 0.972       | 0.281 | 0.530   | 1.924   |
| SCO       | MeHg     | Prey Miss Proportion       | -3.305                        | 1.328 | -5.952  | -0.7121 | 1.047       | 0.070 | 0.746   | 1.108   |
| SCO       | MeHg     | Reaction Distance (mm)     | 177.7                         | 19.1  | 139.9   | 215.3   | p           | 1.151 | 0.226   | 0.619   |
| SCO       | MeHg     | Swimming Bout Speed (mm/s) | 144.4                         | 27.91 | 89.75   | 199.1   | 0.936       | 0.194 | 0.614   | 1.547   |
| SCO       | MeHg     | Total Time Swimming (sec)  | 53.25                         | 16.69 | 20.48   | 85.98   | 0.481       | 0.163 | 0.142   | 0.869   |
| SCO       | PCB126   | Prey Handling Time         | 17.94                         | 8.278 | 1.574   | 34.12   | p           | 1.662 | 0.827   | 7.003   |
| SCO       | PCB126   | Prey Miss Proportion       | -1.346                        | 1.327 | -3.963  | 1.251   | p           | 0.826 | 0.211   | 1.090   |
| SCO       | PCB126   | Reaction Distance (mm)     | 172.3                         | 19.32 | 134.6   | 209.9   | 1.078       | 0.230 | 0.540   | 1.575   |
| SCO       | PCB126   | Swimming Bout Speed (mm/s) | 142.8                         | 28.13 | 87.5    | 197.8   | 0.951       | 0.203 | 0.619   | 1.591   |
| SCO       | PCB126   | Total Time Swimming (sec)  | 48                            | 16.85 | 14.91   | 81.09   | n           | 0.425 | 0.161   | 0.094   |
| NBH       | Control  | Prey Handling Time         | 27.89                         | 8.162 | 11.74   | 43.84   | 1.000       | 0.287 | 0.545   | 2.004   |
| NBH       | Control  | Prey Miss Proportion       | -3.003                        | 1.308 | -5.589  | -0.4375 | 1.000       | 0.083 | 0.657   | 1.076   |
| NBH       | Control  | Reaction Distance (mm)     | 179.9                         | 18.97 | 142.5   | 216.9   | 1.000       | 0.190 | 0.557   | 1.414   |
| NBH       | Control  | Swimming Bout Speed (mm/s) | 141.5                         | 27.87 | 86.93   | 196     | 1.000       | 0.212 | 0.654   | 1.670   |
| NBH       | Control  | Total Time Swimming (sec)  | 51.82                         | 16.7  | 19.06   | 84.56   | 0.466       | 0.163 | 0.130   | 0.851   |
| NBH       | PCB126   | Prey Handling Time         | 23.22                         | 8.243 | 6.883   | 39.16   | p           | 1.238 | 0.424   | 2.917   |
| NBH       | PCB126   | Prey Miss Proportion       | -2.261                        | 1.323 | -4.893  | 0.314   | 0.933       | 0.135 | 0.457   | 1.072   |

|     |        |                            |       |       |       |       |       |       |       |       |
|-----|--------|----------------------------|-------|-------|-------|-------|-------|-------|-------|-------|
| NBH | PCB126 | Reaction Distance (mm)     | 172   | 19.27 | 133.6 | 210   | 0.907 | 0.198 | 0.446 | 1.339 |
| NBH | PCB126 | Swimming Bout Speed (mm/s) | 134.3 | 28.12 | 79.02 | 189.3 | 1.073 | 0.243 | 0.682 | 1.856 |
| NBH | PCB126 | Total Time Swimming (sec)  | 49.88 | 16.81 | 16.94 | 82.89 | 0.443 | 0.161 | 0.111 | 0.830 |

---

**Table S14.** Posterior distributions for all model parameters and each behavioral endpoint.

Submitted this table as a text tab separated file.

**Table S15.** Significant results of the treatment effects on Atlantic killifish larvae behavior after exposure to sublethal levels of MeHg and PCB126. Presented for each behavior endpoint and treatment is the mean (original or back-transformed), transformed mean, P-value in parentheses, and pattern of significant trends. Trends are based on original mean trends. P-values and trends are reported in the following order: SCO-Ctrl vs SCO-Hg, SCO-Ctrl vs SCO-PCB, SCO-Ctrl vs NBH-Ctrl, SCO-PCB vs NBH-PCB, NBH-Ctrl vs NBH-PCB (Neg = significant negative trend, Pos = significant positive trend, □ = no significant trend, HMM = Hidden Markov Chain model endpoint).

| Parameter                    | SCO-Ctrl | SCO-Hg   | SCO-PCB  | NBH-Ctrl | NBH-PCB  | Significant Trends |
|------------------------------|----------|----------|----------|----------|----------|--------------------|
| VMR                          |          |          |          |          |          |                    |
| Assay                        |          |          |          |          |          |                    |
| Period 2, Light to Dark      |          |          |          |          |          |                    |
| Startle Magnitude (mm)       | 53.1345  | 59.8116  | 52.3395  | 68.6335  | 63.3233  |                    |
|                              | 487.5    | 477.4    | 488.8    | 465.9    | 472.6    |                    |
|                              | (0.3196) | (0.9036) | (0.0360) | (0.1214) | (0.5232) | □ □ Pos □ □        |
| Period 4, Light to Dark      |          |          |          |          |          |                    |
| Startle Magnitude (mm)       | 52.2579  | 53.0612  | 50.9493  | 57.2169  | 66.7569  |                    |
|                              | 573.2    | 572      | 575.2    | 566.1    | 554.2    |                    |
|                              | (0.8874) | (0.8288) | (0.4220) | (0.0232) | (0.1919) | □ □ □ Neg □        |
| Period 1, Light              |          |          |          |          |          |                    |
| Swimming Bouts (per sec)     |          |          |          |          |          |                    |
|                              | 1.4819   | 1.5468   | 1.2431   | 1.5020   | 1.4358   |                    |
|                              | 836.7    | 948.8    | 511.2    | 870.3    | 763.7    |                    |
|                              | (0.1182) | (0.0)    | (0.6360) | (0.0009) | (0.1418) | □ Neg □ Neg □      |
| Swimming Bout Duration (sec) |          |          |          |          |          |                    |
|                              | 0.3002   | 0.2629   | 0.2542   | 0.2749   | 0.2619   |                    |
|                              | 248.7    | 290.2    | 301.1    | 276.1    | 291.5    |                    |
|                              | (0.1124) | (0.0464) | (0.2898) | (0.7192) | (0.5566) | □ Neg □ □ □        |
| Swimming Bout Speed (mm/s)   |          |          |          |          |          |                    |
|                              | 6.5159   | 6.3247   | 5.7085   | 6.2343   | 6.3508   |                    |
|                              | 2203     | 2246     | 2399     | 2267     | 2240     |                    |
|                              | (0.5312) | (0.0058) | (0.3576) | (0.0268) | (0.7044) | □ Neg □ Neg □      |
| Total Distance Traveled (mm) |          |          |          |          |          |                    |
|                              | 1793.29  | 1570.01  | 1123.74  | 1678.03  | 1468.77  |                    |
|                              | 1206     | 1202     | 1192     | 1204     | 1200     |                    |

|                                             |          |          |          |          |          |               |
|---------------------------------------------|----------|----------|----------|----------|----------|---------------|
| Total Time Swimming<br>(sec)                | (0.2974) | (0.0002) | (0.5050) | (0.0264) | (0.3612) | □ Neg □ Neg □ |
|                                             | 274.1170 | 248.8296 | 193.3380 | 260.8265 | 234.9453 |               |
|                                             | 385.2    | 361.8    | 307.3    | 373      | 348.6    |               |
| Overall Step Length (mm)                    | (0.2366) | (0.0002) | (0.5358) | (0.0443) | (0.2256) | □ Neg □ Neg □ |
|                                             | 0.0994   | 0.0890   | 0.0649   | 0.0935   | 0.0835   |               |
|                                             | 420.3    | 458.4    | 562.6    | 441.5    | 480.1    |               |
| Overall Step Length<br>Variation            | (0.3298) | (0.0006) | (0.5848) | (0.0410) | (0.3312) | □ Neg □ Neg □ |
|                                             | 0.2049   | 0.1952   | 0.1677   | 0.2062   | 0.1937   |               |
|                                             | 442.8    | 458.8    | 507.8    | 440.8    | 461.3    |               |
| Overall Turning Angle<br>Variation          | (0.4754) | (0.0048) | (0.9284) | (0.0464) | (0.3688) | □ Neg □ Neg □ |
|                                             | 1.3142   | 1.2338   | 1.5346   | 1.2971   | 1.2882   |               |
|                                             | 751.8    | 760.9    | 728.9    | 753.7    | 754.7    |               |
| Period 2, Dark<br>Swimming Bouts (per sec)  | (0.3578) | (0.0220) | (0.8462) | (0.0112) | (0.9192) | □ Pos □ Pos □ |
|                                             | 2.2416   | 2.3658   | 1.9063   | 2.2950   | 2.2384   |               |
|                                             | 1242     | 1449     | 793.8    | 1328     | 1237     |               |
| Swimming Bout Duration<br>(sec)             | (0.0688) | (0.0001) | (0.4440) | (0.0002) | (0.430)  | □ Neg □ Neg □ |
|                                             | 0.3432   | 0.3025   | 0.3778   | 0.3158   | 0.3061   |               |
|                                             | 235.6    | 273.9    | 208      | 260.6    | 270.2    |               |
| Overall Turning Angle                       | (0.0712) | (0.1895) | (0.2334) | (0.0045) | (0.6512) | □ □ □ Pos □   |
|                                             | -0.0051  | -0.0028  | 0.0023   | -0.0009  | 0.0022   |               |
|                                             | 94.96    | 97.15    | 102.4    | 99.1     | 102.3    |               |
| Period 3, Light<br>Swimming Bouts (per sec) | (0.5550) | (0.0470) | (0.2654) | (0.9728) | (0.3944) | □ Pos □ □ □   |
|                                             | 2.9236   | 3.0012   | 2.4600   | 2.9255   | 2.8737   |               |
|                                             | 382.4    | 416.4    | 221.3    | 383.2    | 361.7    |               |
| Swimming Bout Duration<br>(sec)             | (0.3224) | (0.0)    | (0.9792) | (0.0002) | (0.5366) | □ Neg □ Neg □ |
|                                             | 0.1563   | 0.1256   | 0.1268   | 0.1321   | 0.1375   |               |
|                                             | 295.3    | 370.1    | 366.8    | 352.8    | 338.8    |               |
|                                             | (0.0168) | (0.0228) | (0.0634) | (0.3758) | (0.6542) | Neg Neg □ □ □ |

|                                 |                                |                                |                                |                                |                                |                                                                                                         |
|---------------------------------|--------------------------------|--------------------------------|--------------------------------|--------------------------------|--------------------------------|---------------------------------------------------------------------------------------------------------|
| Total Distance Traveled (mm)    | 1738.8938<br>9281<br>(0.0588)  | 1357.4067<br>9304<br>(0.0004)  | 1060.2124<br>9327<br>(0.1918)  | 1463.5928<br>9297<br>(0.0092)  | 1511.6317<br>9294<br>(0.8392)  | <input type="checkbox"/> Neg <input type="checkbox"/> Neg <input type="checkbox"/>                      |
| Total Time Swimming (sec)       | 275.6974<br>409<br>(0.0496)    | 231.1920<br>364.3<br>(0.0002)  | 191.4978<br>321.9<br>(0.1236)  | 240.7212<br>374.1<br>(0.0126)  | 247.0143<br>380.5<br>(0.780)   | Neg Neg <input type="checkbox"/> Neg <input type="checkbox"/>                                           |
| Overall Step Length (mm)        | 0.0948<br>369.4<br>(0.0508)    | 0.0752<br>450.3<br>(0.0006)    | 0.0620<br>516.1<br>(0.1834)    | 0.0811<br>424.1<br>(0.0130)    | 0.0844<br>410.3<br>(0.7398)    | <input type="checkbox"/> Neg <input type="checkbox"/> Neg <input type="checkbox"/>                      |
| Overall Step Length Variation   | 0.1940<br>255.3<br>(0.0876)    | 0.1722<br>294.2<br>(0.0024)    | 0.1565<br>326.4<br>(0.3310)    | 0.1813<br>277.3<br>(0.0328)    | 0.1818<br>276.4<br>(0.9690)    | <input type="checkbox"/> Neg <input type="checkbox"/> Neg <input type="checkbox"/>                      |
| Overall Turning Angle Variation | 1.3954<br>1689<br>(0.5788)     | 1.4524<br>1713<br>(0.0156)     | 1.6561<br>1797<br>(0.8142)     | 1.4191<br>1699<br>(0.0022)     | 1.3179<br>1656<br>(0.3350)     | <input type="checkbox"/> Pos <input type="checkbox"/> Pos <input type="checkbox"/>                      |
| Period 4, Dark                  |                                |                                |                                |                                |                                |                                                                                                         |
| Swimming Bouts (per sec)        | 3.6596<br>471.4<br>(0.1446)    | 3.8141<br>537.1<br>(0.0)       | 3.1062<br>284.3<br>(0.6766)    | 3.7049<br>490<br>(0.0001)      | 3.6593<br>471.3<br>(0.6808)    | <input type="checkbox"/> Neg <input type="checkbox"/> Neg <input type="checkbox"/>                      |
| Swimming Bout Duration (sec)    | 0.2132<br>216<br>(0.0596)      | 0.1882<br>254.7<br>(0.1262)    | 0.2376<br>184.4<br>(0.1592)    | 0.1943<br>244.6<br>(0.0035)    | 0.1930<br>246.7<br>(0.920)     | <input type="checkbox"/> <input type="checkbox"/> <input type="checkbox"/> Pos <input type="checkbox"/> |
| Total Distance Traveled (mm)    | 5464.0032<br>977.4<br>(0.0240) | 4659.5653<br>860.5<br>(0.4388) | 5184.4966<br>937.2<br>(0.3494) | 5132.6770<br>929.7<br>(0.8470) | 5115.4270<br>927.2<br>(0.9570) | Neg <input type="checkbox"/> <input type="checkbox"/> <input type="checkbox"/> <input type="checkbox"/> |
| Overall Step Length (mm)        | 0.3034<br>918.7<br>(0.020)     | 0.2584<br>929.1<br>(0.3978)    | 0.2867<br>922.5<br>(0.3298)    | 0.2845<br>923<br>(0.8648)      | 0.2837<br>923.2<br>(0.9572)    | Neg <input type="checkbox"/> <input type="checkbox"/> <input type="checkbox"/> <input type="checkbox"/> |

|                               |                               |                               |                                |                               |                               |               |
|-------------------------------|-------------------------------|-------------------------------|--------------------------------|-------------------------------|-------------------------------|---------------|
| Overall Step Length Variation | 0.3931<br>598.2<br>(0.0444)   | 0.3562<br>623.6<br>(0.1142)   | 0.3638<br>618.2<br>(0.9948)    | 0.3932<br>598.1<br>(0.1124)   | 0.3938<br>597.7<br>(0.9770)   | Neg □ □ □ □   |
| Locomotion Assay              |                               |                               |                                |                               |                               |               |
| Swimming Bouts (per sec)      | 0.6614<br>706<br>(0.5820)     | 0.6489<br>685.8<br>(0.0004)   | 0.5510<br>541.8<br>(0.7370)    | 0.6538<br>693.6<br>(0.0460)   | 0.6217<br>643.3<br>(0.2444)   | □ Neg □ Neg □ |
| Swimming Bout Duration (sec)  | 0.7389<br>16.11<br>(0.2120)   | 0.6894<br>17.72<br>(0.4114)   | 0.6973<br>17.45<br>(0.0218)    | 0.6522<br>19.07<br>(0.7884)   | 0.6834<br>17.93<br>(0.4554)   | □ □ Neg □ □   |
| Swimming Bout Turning Angle   | -0.0006<br>398.9<br>(0.8572)  | 0.0019<br>404.7<br>(0.4998)   | -0.0130<br>346.3<br>(0.4304)   | 0.0107<br>396.1<br>(0.1922)   | -0.0402<br>403<br>(0.0038)    | □ □ □ □ Neg   |
| Total Distance Traveled (mm)  | 998.40<br>465.2<br>(0.0739)   | 1005.00<br>444.8<br>(0.0261)  | 966.80<br>433<br>(0.0699)      | 1028.00<br>444.3<br>(0.5896)  | 899.10<br>441.5<br>(0.8328)   | □ Neg □ □ □   |
| Total Time Swimming (sec)     | 162.3100<br>58.94<br>(0.0588) | 142.7790<br>53.23<br>(0.0045) | 125.3102<br>47.99<br>(0.0197)  | 138.0342<br>51.82<br>(0.6506) | 131.5586<br>49.88<br>(0.5844) | □ Neg Neg □ □ |
| HMM Endpoints                 |                               |                               |                                |                               |                               |               |
| Medium State                  |                               |                               |                                |                               |                               |               |
| Step Length (mm)              | 0.2631<br>90.54<br>(0.2846)   | 0.2666<br>83.41<br>(0.1266)   | 0.2673<br>81.92<br>(0.0701)    | 0.2693<br>78.15<br>(0.0460)   | 0.2619<br>93.11<br>(0.0282)   | □ □ □ Pos Neg |
| Step Length Variation         | 0.0483<br>24.28<br>(0.2842)   | 0.0514<br>22.26<br>(0.1797)   | 0.0516<br>22.12<br>(0.0794)    | 0.0536<br>20.89<br>(0.0863)   | 0.0475<br>24.87<br>(0.0386)   | □ □ □ □ Neg   |
| Turning Angle                 | 0.2329<br>2.329<br>(0.1170)   | -0.3253<br>-3.253<br>(0.3038) | -0.0783<br>-0.7827<br>(0.0417) | -0.5140<br>-5.14<br>(0.3454)  | 0.2078<br>2.078<br>(0.0468)   | □ □ Neg □ Pos |
| Turning Angle Variation       | 1.9057<br>49.99               | 1.0184<br>63.35               | 1.3174<br>57.91                | 1.2779<br>58.56               | 1.5122<br>54.95               |               |

|                                |                             |                             |                             |                             |                             |                 |
|--------------------------------|-----------------------------|-----------------------------|-----------------------------|-----------------------------|-----------------------------|-----------------|
|                                | (0.0084)                    | (0.0646)                    | (0.0992)                    | (0.490)                     | (0.4818)                    | Neg □ □ □ □     |
| State Transition Probabilities |                             |                             |                             |                             |                             |                 |
| Slow -> Slow                   | 0.9094<br>126.5<br>(0.2398) | 0.9305<br>130.4<br>(0.1464) | 0.8851<br>122.5<br>(0.0056) | 0.9570<br>136.2<br>(0.0985) | 0.9122<br>127<br>(0.0079)   | □ □ Pos □ Neg   |
| Medium -> Slow                 | 0.5339<br>53.39<br>(0.1552) | 0.6187<br>61.87<br>(0.6680) | 0.5556<br>55.56<br>(0.0006) | 0.7497<br>74.97<br>(0.6762) | 0.5763<br>57.63<br>(0.0048) | □ □ Pos □ Neg   |
| Slow -> Medium                 | 0.0575<br>24.21<br>(0.4856) | 0.0481<br>22.11<br>(0.2776) | 0.0709<br>26.95<br>(0.0144) | 0.0277<br>16.71<br>(0.2382) | 0.0564<br>23.97<br>(0.0174) | □ □ Neg □ Pos   |
| Medium -> Medium               | 0.3892<br>38.92<br>(0.0258) | 0.5603<br>56.03<br>(0.3768) | 0.4469<br>44.69<br>(0.0004) | 0.6711<br>67.11<br>(0.9704) | 0.4445<br>44.45<br>(0.0038) | Pos □ Pos □ Neg |
| Fast -> Slow                   | 0.0051<br>69.58<br>(0.3214) | 0.0036<br>77.34<br>(0.1630) | 0.0071<br>60.35<br>(0.0568) | 0.0023<br>85.07<br>(0.2860) | 0.0056<br>67.38<br>(0.0290) | □ □ □ □ Pos     |
| Slow -> Fast                   | 0.0226<br>15.1<br>(0.3210)  | 0.0188<br>13.75<br>(0.0592) | 0.0296<br>17.29<br>(0.0061) | 0.0124<br>11.14<br>(0.0432) | 0.0223<br>14.98<br>(0.0072) | □ □ Neg Pos Pos |
| Medium -> Fast                 | 0.1753<br>43.88<br>(0.0244) | 0.1164<br>57.04<br>(0.4452) | 0.1567<br>47.59<br>(0.0224) | 0.1142<br>57.61<br>(0.9528) | 0.1581<br>47.3<br>(0.0831)  | Neg □ Neg □ □   |
| Fast -> Fast                   | 0.7732<br>137.8<br>(0.0380) | 0.7981<br>155.4<br>(0.8732) | 0.7748<br>138.9<br>(0.0654) | 0.7966<br>154.3<br>(0.9198) | 0.7738<br>138.2<br>(0.0718) | Pos □ □ □ □     |
| Feeding Assay                  |                             |                             |                             |                             |                             |                 |
| Prey Capture Probability       | 0.9962<br>5.559<br>(0.0058) | 0.9999<br>9.482<br>(0.5228) | 0.9986<br>6.576<br>(0.0032) | 0.9999<br>9.644<br>(0.7296) | 0.9992<br>7.176<br>(0.1432) | Pos □ Pos □ □   |
| Prey Handling Time             | 0.8375<br>27.87             | 0.8171<br>28.53             | 1.2669<br>17.93             | 0.8368<br>27.89             | 1.0039<br>23.23             |                 |



|                        |          |          |          |          |          |               |
|------------------------|----------|----------|----------|----------|----------|---------------|
|                        |          |          |          |          |          | □ Pos □ Pos   |
| Capture Attempt Ratio  | (0.6996) | (0.0)    | (0.9940) | (0.0227) | (0.0155) | Pos           |
|                        | 0.9400   | 1.0390   | 1.1956   | 1.0484   | 1.1340   |               |
|                        | 48.24    | 45.67    | 42.1     | 45.44    | 43.44    |               |
|                        |          |          |          |          |          | Pos Pos Pos □ |
| Prey Miss Proportion   | (0.0430) | (0.0001) | (0.0226) | (0.4230) | (0.1535) | □             |
|                        | 0.0649   | 0.0355   | 0.2064   | 0.0474   | 0.0935   |               |
|                        | -2.667   | -3.302   | -1.347   | -3.001   | -2.272   |               |
|                        | (0.0865) | (0.0012) | (0.3366) | (0.0334) | (0.0606) | □ Pos □ Pos □ |
| Reaction Distance (mm) | 0.4093   | 0.4671   | 0.4372   | 0.4792   | 0.4350   |               |
|                        | 167.3    | 177.7    | 172.3    | 179.9    | 171.9    |               |
|                        | (0.0096) | (0.2978) | (0.0012) | (0.9364) | (0.0732) | Pos □ Pos □ □ |

---

**Table S16.** Significantly differentially expressed genes ( $\alpha = 0.05$ ) found in the brains of Atlantic killifish *Fundulus heteroclitus* in this study. Significant trends and FDR value are reported (Ctrl = Control treatment, Neg = significant negative trend, Pos = significant positive trend, SCO = Scorton Creek larvae, NBH = New Bedford Harbor larvae, Hg = methylmercury). Blanks indicate comparison was tested but did not result in a significant difference.

Submitted this table as a text tab separated file.

**Table S17.** Significantly altered gene pathways ( $\alpha = 0.05$ ) found in the brains of Atlantic killifish *Fundulus heteroclitus* in this study. Significant trends and q-value are reported (Ctrl = Control treatment, Neg = significant negative trend, Pos = significant positive trend, SCO = Scorton Creek larvae, NBH = New Bedford Harbor larvae, Hg = methylmercury). Blanks indicate comparison was tested but did not result in a significant difference.

Submitted this table as a text tab separated file.

**Table S18.** Significant MeHg treatment patterns shared by differentially expressed genes and behavior endpoints in Atlantic killifish *Fundulus heteroclitus* found in this study. Both the original and opposite behavior endpoint trends are listed (Neg = significant negative trend, Pos = significant positive trend, - = no significant trend, HMM = Hidden Markov Chain model endpoint).

| Significant Treatment Pattern | Gene Expression                                                                                                                                                                                                                    | Behavior Endpoint                                                                                                                                                                                                                                                                  |
|-------------------------------|------------------------------------------------------------------------------------------------------------------------------------------------------------------------------------------------------------------------------------|------------------------------------------------------------------------------------------------------------------------------------------------------------------------------------------------------------------------------------------------------------------------------------|
| Pos                           | LOC105915521, LOC105916522, LOC105917295, LOC105918273, LOC105922825, LOC105924291, LOC105934237, LOC105936060, LOC110366363, LOC110366373, LOC118559084, LOC118560703, LOC118560704, LOC118562969, LOC118563898, si:ch211-186j3.6 | HMM Fast -> Fast Transition Probabilities, Lung Ratio, HMM Medium -> Medium Transition Probabilities, Prey Capture Probability, Reaction Distance (mm)                                                                                                                             |
| Neg                           | klhl6, LOC105915433, LOC105933875, LOC118566104, scamp1, si:dkey-21c1.4                                                                                                                                                            | HMM Medium State Turning Angle Variation, HMM Medium -> Fast Transition Probabilities, Overall Step Length Period 4 (mm), Overall Step Length Variation Period 4, Swimming Bout Duration Period 3 (sec), Total Distance Traveled Period 4 (mm), Total Time Swimming Period 3 (sec) |

**Table S19.** Significant PCB126 (PCB) treatment patterns shared by differentially expressed genes and behavior endpoints in Atlantic killifish *Fundulus heteroclitus* found in this study. Both the original and opposite behavior endpoint trends are listed (Ctrl = Control treatment, Neg = significant negative trend, Pos =

significant positive trend, NS = no significant trend, HMM = Hidden Markov Chain model endpoint, TP = Transition Probability).

Submitted this table as a text tab separated file.

**Table S20.** Significant PCB126 (PCB) treatment patterns shared by gene pathways and behavior endpoints in Scorton Creek (SCO) Atlantic killifish found in this study. Both the original and opposite behavior endpoint trends are listed (Ctrl = Control treatment, Neg = significant negative trend, Pos = significant positive trend, NS = no significant trend, HMM = Hidden Markov Chain model endpoint, TP = Transition Probability).

Submitted this table as a text tab separated file.

**Table S21.** Summary of PCB126 (PCB) significant treatment patterns found in Atlantic killifish behavior endpoints (Ctrl = control treatment, Tan = significant negative trend compared to control, Blue = significant positive trend compared to control, Black = no significant trend compared to control, HMM = Hidden Markov Chain model endpoint, TP = Transition Probability).

| Reference Number | Significant Treatment Pattern |                      |                    |                     | Behavior Endpoint                                                                                                                                                                                                                                                                                                                                                                                                                                                                 |
|------------------|-------------------------------|----------------------|--------------------|---------------------|-----------------------------------------------------------------------------------------------------------------------------------------------------------------------------------------------------------------------------------------------------------------------------------------------------------------------------------------------------------------------------------------------------------------------------------------------------------------------------------|
|                  | SCO-Ctrl vs SCO-PCB           | SCO-Ctrl vs NBH-Ctrl | SCO-PCB vs NBH-PCB | NBH-Ctrl vs NBH-PCB |                                                                                                                                                                                                                                                                                                                                                                                                                                                                                   |
| 1                | Blue                          | Black                | Blue               | Blue                | Prey Handling Time                                                                                                                                                                                                                                                                                                                                                                                                                                                                |
| 2                | Blue                          | Black                | Blue               | Black               | Prey Miss Proportion, Overall Turning Angle Variation Period 1, Overall Turning Angle Variation Period 3                                                                                                                                                                                                                                                                                                                                                                          |
| 3                | Tan                           | Black                | Tan                | Black               | Swimming Bouts (per sec), Swimming Bouts Period 1 (per sec), Swimming Bouts Period 2 (per sec), Swimming Bouts Period 3 (per sec), Swimming Bouts Period 4 (per sec), Swimming Bout Speed Period 1 (mm/s), Total Distance Traveled Period 1 (mm), Total Time Swimming Period 1 (sec), Overall Step Length Period 1 (mm), Overall Step Length Variation Period 1, Total Distance Traveled Period 3 (mm), Overall Step Length Period 3 (mm), Overall Step Length Variation Period 3 |
| 4                | Blue                          | Black                | Black              | Black               | Overall Turning Angle Period 2                                                                                                                                                                                                                                                                                                                                                                                                                                                    |
| 5                | Tan                           | Black                | Black              | Black               | Total Distance Traveled (mm), Swimming Bout Duration Period 1 (sec), Swimming Bout Duration Period 3 (sec)                                                                                                                                                                                                                                                                                                                                                                        |
| 6                | Blue                          | Black                | Black              | Black               | Capture Attempt Ratio                                                                                                                                                                                                                                                                                                                                                                                                                                                             |
| 7                | Tan                           | Black                | Black              | Black               | Total Time Swimming (sec)                                                                                                                                                                                                                                                                                                                                                                                                                                                         |
| 8                | Black                         | Blue                 | Black              | Black               | Prey Capture Probability, Reaction Distance (mm), Startle Magnitude Period 2                                                                                                                                                                                                                                                                                                                                                                                                      |
| 9                | Black                         | Tan                  | Black              | Black               | Swimming Bout Duration (sec), HMM Medium -> Fast TP                                                                                                                                                                                                                                                                                                                                                                                                                               |
| 10               | Black                         | Blue                 | Black              | Tan                 | HMM Slow -> Slow TP, HMM Medium -> Slow TP, HMM Medium -> Medium TP                                                                                                                                                                                                                                                                                                                                                                                                               |
| 11               | Black                         | Tan                  | Black              | Blue                | HMM Medium State Turning Angle, HMM Slow -> Medium TP                                                                                                                                                                                                                                                                                                                                                                                                                             |

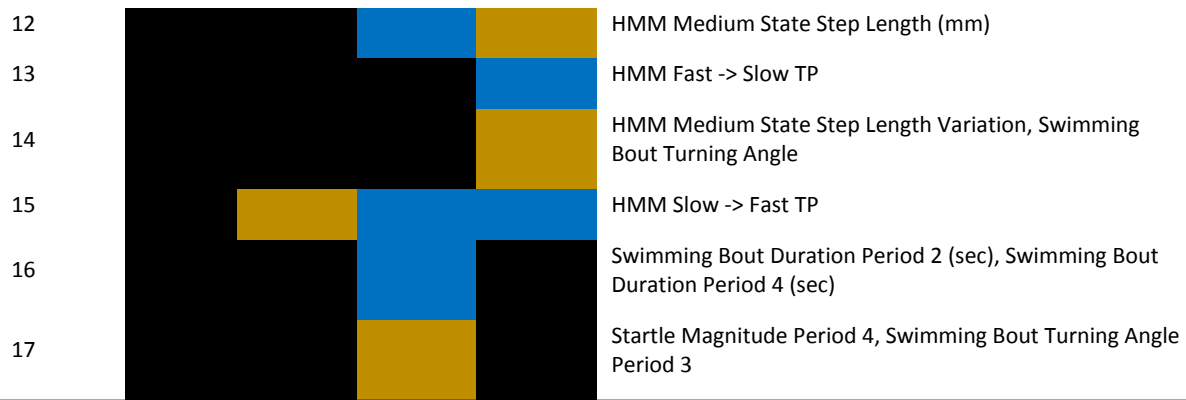

**Table S22.** Summary of mercury (Hg) significant treatment patterns found in Atlantic killifish behavior endpoints (Ctrl = control treatment, Tan = significant negative trend compared to control, Blue = significant positive trend compared to control, Black = no significant trend compared to control, HMM = Hidden Markov Chain model endpoint, TP = Transition Probability).

| SCO-Ctrl vs SCO-Hg | Behavior Endpoint                                                                                                                                                                                                                                            |
|--------------------|--------------------------------------------------------------------------------------------------------------------------------------------------------------------------------------------------------------------------------------------------------------|
|                    | Capture Attempt Ratio, Prey Capture Probability, Reaction Distance (mm), HMM Fast -> Fast TP, HMM Medium -> Medium TP                                                                                                                                        |
|                    | HMM Medium State Turning Angle Variation, HMM Medium -> Fast TP, Swimming Bout Duration Period 3 (sec), Total Time Swimming Period 3 (sec), Overall Step Length Period 4 (mm), Overall Step Length Variation Period 4, Total Distance Traveled Period 4 (mm) |

**Table S23.** Summary of mercury (Hg) and PCB126 significant treatment patterns found in Scorton Creek (SCO) and PCB126 (PCB) effects on New Bedford Harbor (NBH) Atlantic killifish behavior endpoints (Ctrl = control treatment, Tan = significant negative trend compared to control, Blue = significant positive trend compared to control, Black = no significant trend compared to control, HMM = Hidden Markov Chain model endpoint).

| Reference Number | Significant Treatment Pattern |                     |                      |                    |                     | Behavior Endpoint                     |
|------------------|-------------------------------|---------------------|----------------------|--------------------|---------------------|---------------------------------------|
|                  | SCO-Ctrl vs SCO-Hg            | SCO-Ctrl vs SCO-PCB | SCO-Ctrl vs NBH-Ctrl | SCO-PCB vs NBH-PCB | NBH-Ctrl vs NBH-PCB |                                       |
| 1                |                               |                     |                      |                    |                     | Total Time Swimming Period 3 (sec)    |
| 2                |                               |                     |                      |                    |                     | Capture Attempt Ratio                 |
| 3                |                               |                     |                      |                    |                     | Swimming Bout Duration Period 3 (sec) |

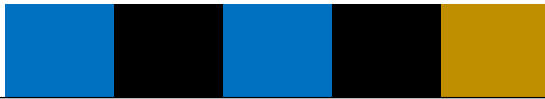

**Table S24.** Significant PCB126 (PCB) treatment patterns shared by gene expression and behavior endpoints in the endpoints in Scorton Creek (SCO) and New Bedford Harbor (NBH) Atlantic killifish found in this study. Genes with unknown names and functions are reported in Table S19. Both the original and opposite behavior endpoint trends are listed (Ctrl = control treatment, Tan = significant negative trend compared to control, Blue = significant positive trend compared to control, Black = no significant trend compared to control, HMM = Hidden Markov Chain model endpoint).

| Significant Treatment Pattern |                      |                    |                     | Gene Expression                                                                                                                                                                                                                                                                                                                                                                                                                                                                                                                                                                                                                                         | Behavior Endpoint                                                                                                                              |                                                           |
|-------------------------------|----------------------|--------------------|---------------------|---------------------------------------------------------------------------------------------------------------------------------------------------------------------------------------------------------------------------------------------------------------------------------------------------------------------------------------------------------------------------------------------------------------------------------------------------------------------------------------------------------------------------------------------------------------------------------------------------------------------------------------------------------|------------------------------------------------------------------------------------------------------------------------------------------------|-----------------------------------------------------------|
| SCO-Ctrl vs SCO-PCB           | SCO-Ctrl vs NBH-Ctrl | SCO-PCB vs NBH-PCB | NBH-Ctrl vs NBH-PCB |                                                                                                                                                                                                                                                                                                                                                                                                                                                                                                                                                                                                                                                         | Original Treatment Pattern                                                                                                                     | Opposite Treatment Pattern                                |
|                               |                      |                    |                     | <b>Metabolic:</b> cmc2, rab4a<br><br><b>Neural:</b> avp, si:dkey-175g6.2, uba1, gad2, ext2, usp22, spata2<br><b>Nucleic:</b> polr2a, kdm2ab, rapgef1b, dyrk1b<br><b>Signaling:</b> pi4kab, plcl1, gareml, grin2ab, stx16, c2cd5, slc6a8, slc8a2b, kctd9a, prkab1a, si:ch211-168f7.5, slc30a1a<br><b>Metabolic:</b> arhgap1, mag, selenoi, epn3b, sucla2, plcx3, elovl6, atp1b2b, arhgap25<br><b>Development:</b> aldh1a2<br><b>Circulatory:</b> b4gat1, pam, numb<br><b>Cellular:</b> ache, fam163ba, sec62, slc25a14, clptm1, coro7, bcat2, rusc1<br><b>Protein Binding and Synthesis:</b> oat, znf598<br><b>Miscellaneous:</b> abl2, klhl26, b3galt1b | HMM Medium State Step Length Variation, Swimming Bout Turning Angle<br><br>Swimming Bout Duration Period 3 (sec), Total Distance Traveled (mm) | HMM Fast -> Slow TP<br><br>Overall Turning Angle Period 2 |

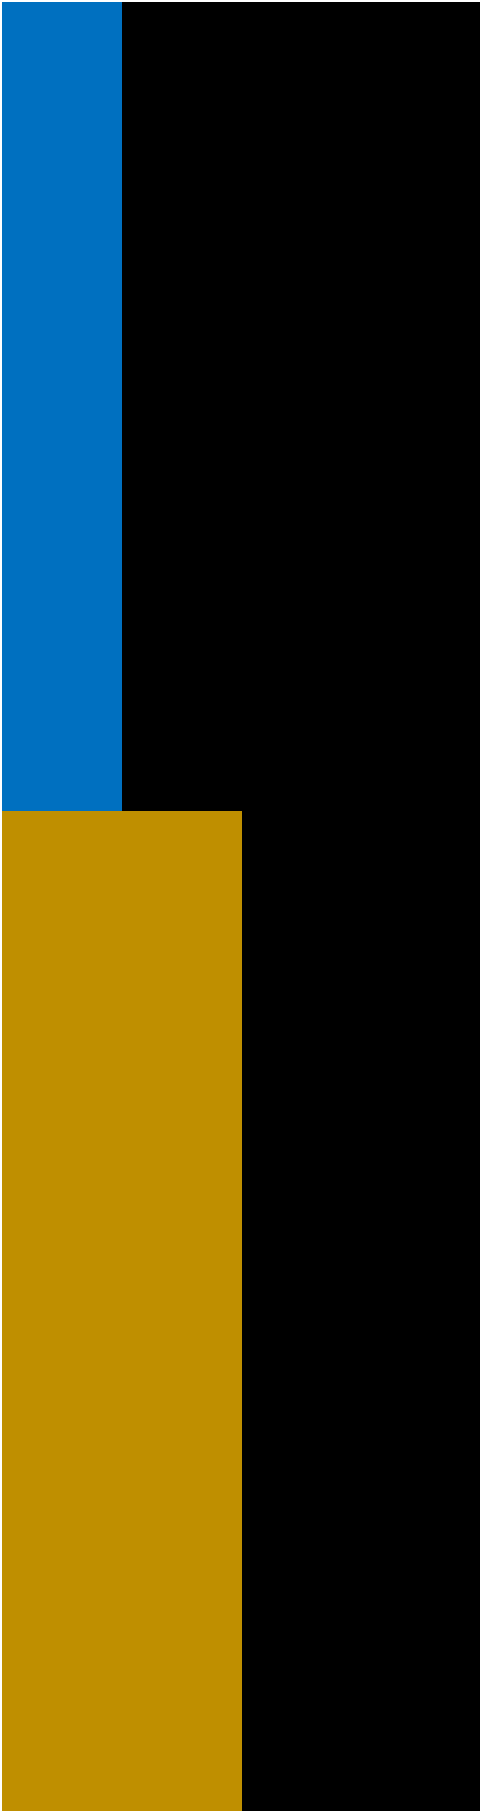

**Neural:** grna, fam53b, psma6a, nusap1, scinla, pmm2, ckma  
**Nucleic:** nrm, anapc15, olig4, tead3b, msx1a, nsmce2, emx2, heyl, nt5c2l1, foxn4, rad51ap1, her12, pane1, cpsf3, pagr1, spi1b, ascl1b  
**Signaling:** myl1, adh5, si:dkey-148a17.6, fcer1g, mylz3, pvalb3, hvcn1, sparac  
**Metabolic:** naga, lcat, gch2, rgs18, rac2  
**Development:** acta1b, tnnt3a, vegfd, dla  
**Sensory:** vps28, lhfp14b, bco1  
**Stress:** slc25a39, cpn1  
**Circulatory:** hcls1, ckmb, mb  
**Transport:** scamp4, cahz  
**Cellular:** nmrk1, mlc1, egl3, mibp, hs2st1b, vsir, rdh8a, tmem45a, si:dkey-9i23.16  
**Immunity:** ctss2.1, tnfaip8l2b  
**Protein Binding and Synthesis:** sumf1  
**Miscellaneous:** si:dkey-225f5.4, si:ch211-236d3.4, fam89b

Overall Turning Angle  
 Period 2  
 Swimming Bout  
 Duration Period 3  
 (sec), Total Distance  
 Traveled (mm)

**Neural:** atcaya, ubap1, hectd1, rnf41, tulp4a, lrrc4.1, neur11aa, desi1a, lnx1, sema3ab, zdhhc17, cntnap2a, usp24  
**Nucleic:** fam98a, seta, senp3b, bhlhe41, rerea, rc3h1b, rprd2a, grid2ipa, evx2, khdc4, tent4a, kdm3b, arid2, fut9a, znf346, rfx1b, elk4, qkia, foxj3, srfb, zfr2, klf6a, larp4ab, pdik1l, ssbp4  
**Signaling:** erbin, spread2a, crk, map3k9, ppp3ccb, nlk1, araf, gramd4a, ndrg3a, zmym2, bmp2k, slit1b, ppp2r5ca, iqsec2b, gpr63, pdpk1b, dusp8a, gnb1b  
**Metabolic:** tbc1d22b, gal3st3, arfgap1, casd1, atp8a2, cdk17, pitpnab, pdk3a, ralaa, ptdss1a, nudt3b  
**Development:** tmem65  
**Stress:** rlim, kmt2e  
**Circulatory:** mybpc2b  
**Transport:** atp1a3a, ptpn23a, scamp1, slc6a17, ap2b1  
**Cellular:** ano8b, zgc:114120, tmem86a, asphd2, si:dkeyp-27e10.3, shank1, enah, ubap2a, kiaa1549la, tm9sf3, syt14a, zdhhc20b, clip3, tspan7b, klc2, ubap2l, dmtn  
**Digestive:** mtor  
**Protein Binding and Synthesis:**

Total Time Swimming  
 (sec)  
 Capture Attempt  
 Ratio

|  |  |                                                                                                                                                                                                                                                                                                                                                                                                                                                                                                                                                            |                       |                           |
|--|--|------------------------------------------------------------------------------------------------------------------------------------------------------------------------------------------------------------------------------------------------------------------------------------------------------------------------------------------------------------------------------------------------------------------------------------------------------------------------------------------------------------------------------------------------------------|-----------------------|---------------------------|
|  |  | mcu, nlg2a, bag6 <b>Miscellaneous:</b><br>ajm1, zgc:158464, scaf8                                                                                                                                                                                                                                                                                                                                                                                                                                                                                          |                       |                           |
|  |  | <b>Neural:</b> stmn1b, im:7136398, slc25a1b, exosc8, snapin<br><b>Nucleic:</b> acin1a, znf207b, pithd1, eif2a<br><b>Signaling:</b> rgn, micu2<br><b>Metabolic:</b> gpx1a, hibadhb, chchd3b, rasd1, ntpcr, ptdc2<br><b>Development:</b> acvrl1, psenen, fgfbp3<br><b>Circulatory:</b> acta2<br><b>Transport:</b> crabp1a, chmp5b, stxbp3<br><b>Cellular:</b> ccdc90b, ppcs, c18h3orf33, cd63, srr, tha1, srxn1, tspan14, atp6ap1a, tbce, tmem9b, tspan3a<br><b>Digestive:</b> scpep1<br><b>Imunity:</b> ifi30<br><b>Protein Binding and Synthesis:</b> alg3 | Capture Attempt Ratio | Total Time Swimming (sec) |

**Table S25.** Individual based model results showing treatment means for individual larva survival and growth of Atlantic killifish *Fundulus heteroclitus* found in this study.

| Scenario | IBM Output Mean |               |
|----------|-----------------|---------------|
|          | Survival (%)    | Growth (mm/d) |
| Spring   |                 |               |
| SCO-Ctrl | 1.512           | 0.29871       |
| SCO-MeHg | 1.648           | 0.29782       |
| SCO-PCB  | 0.044           | 0.12975       |
| NBH-Ctrl | 1.084           | 0.29197       |
| NBH-PCB  | 0.416           | 0.29251       |
| Summer   |                 |               |
| SCO-Ctrl | 1.068           | 0.30167       |
| SCO-MeHg | 1.244           | 0.30697       |
| SCO-PCB  | 0.288           | 0.25546       |
| NBH-Ctrl | 0.788           | 0.28597       |
| NBH-PCB  | 0.42            | 0.28322       |
